# Supplementary material for: La presència de D'Annunzio en l'"estètica arbitrària" de Gabriel Alomar
Source: PeerJ journal article supplement (doi:10.7717/peerj.16523), 1995-01-01

Figure 4F, G, H-Ki67, PCNA, Bax, Bcl-2, GAPDH

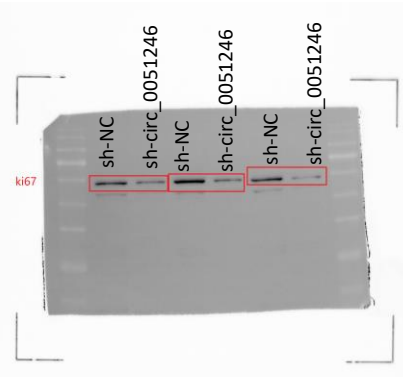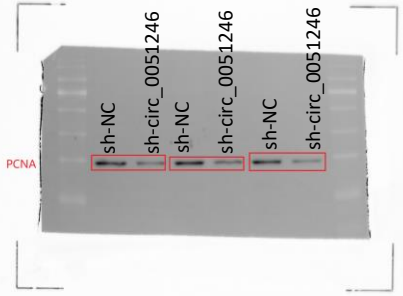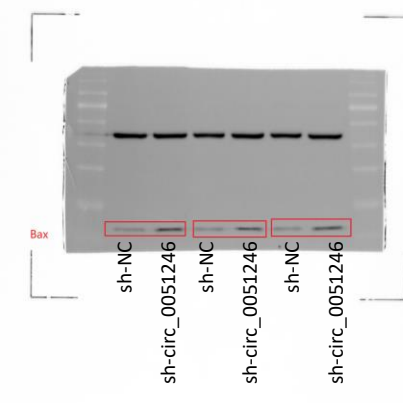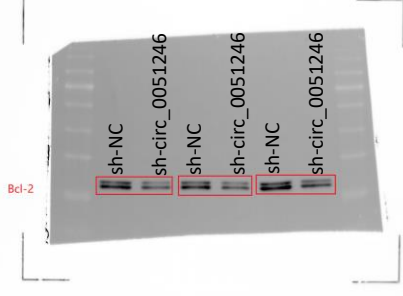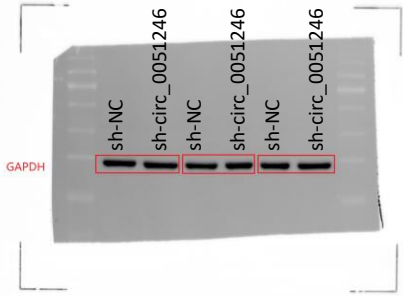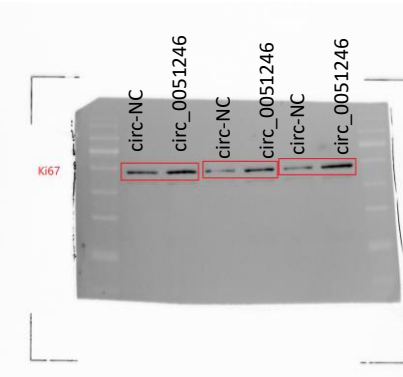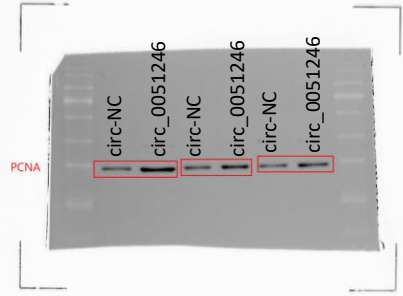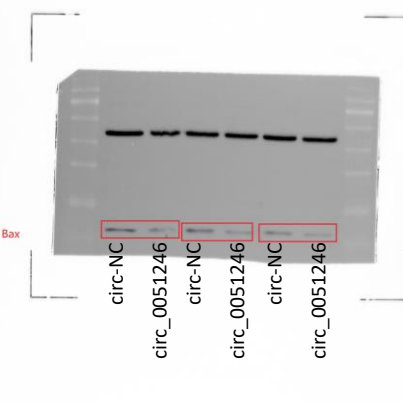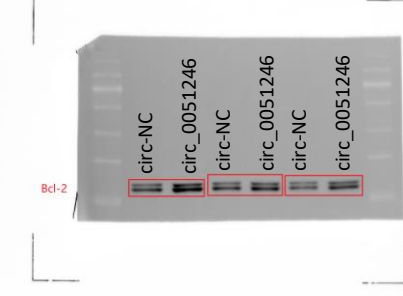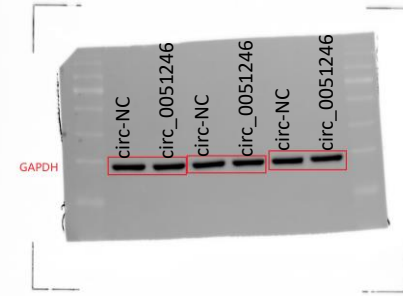

Figure 4F, G, H-N-cadherin, Vimentin, E-cadherin, GAPDH

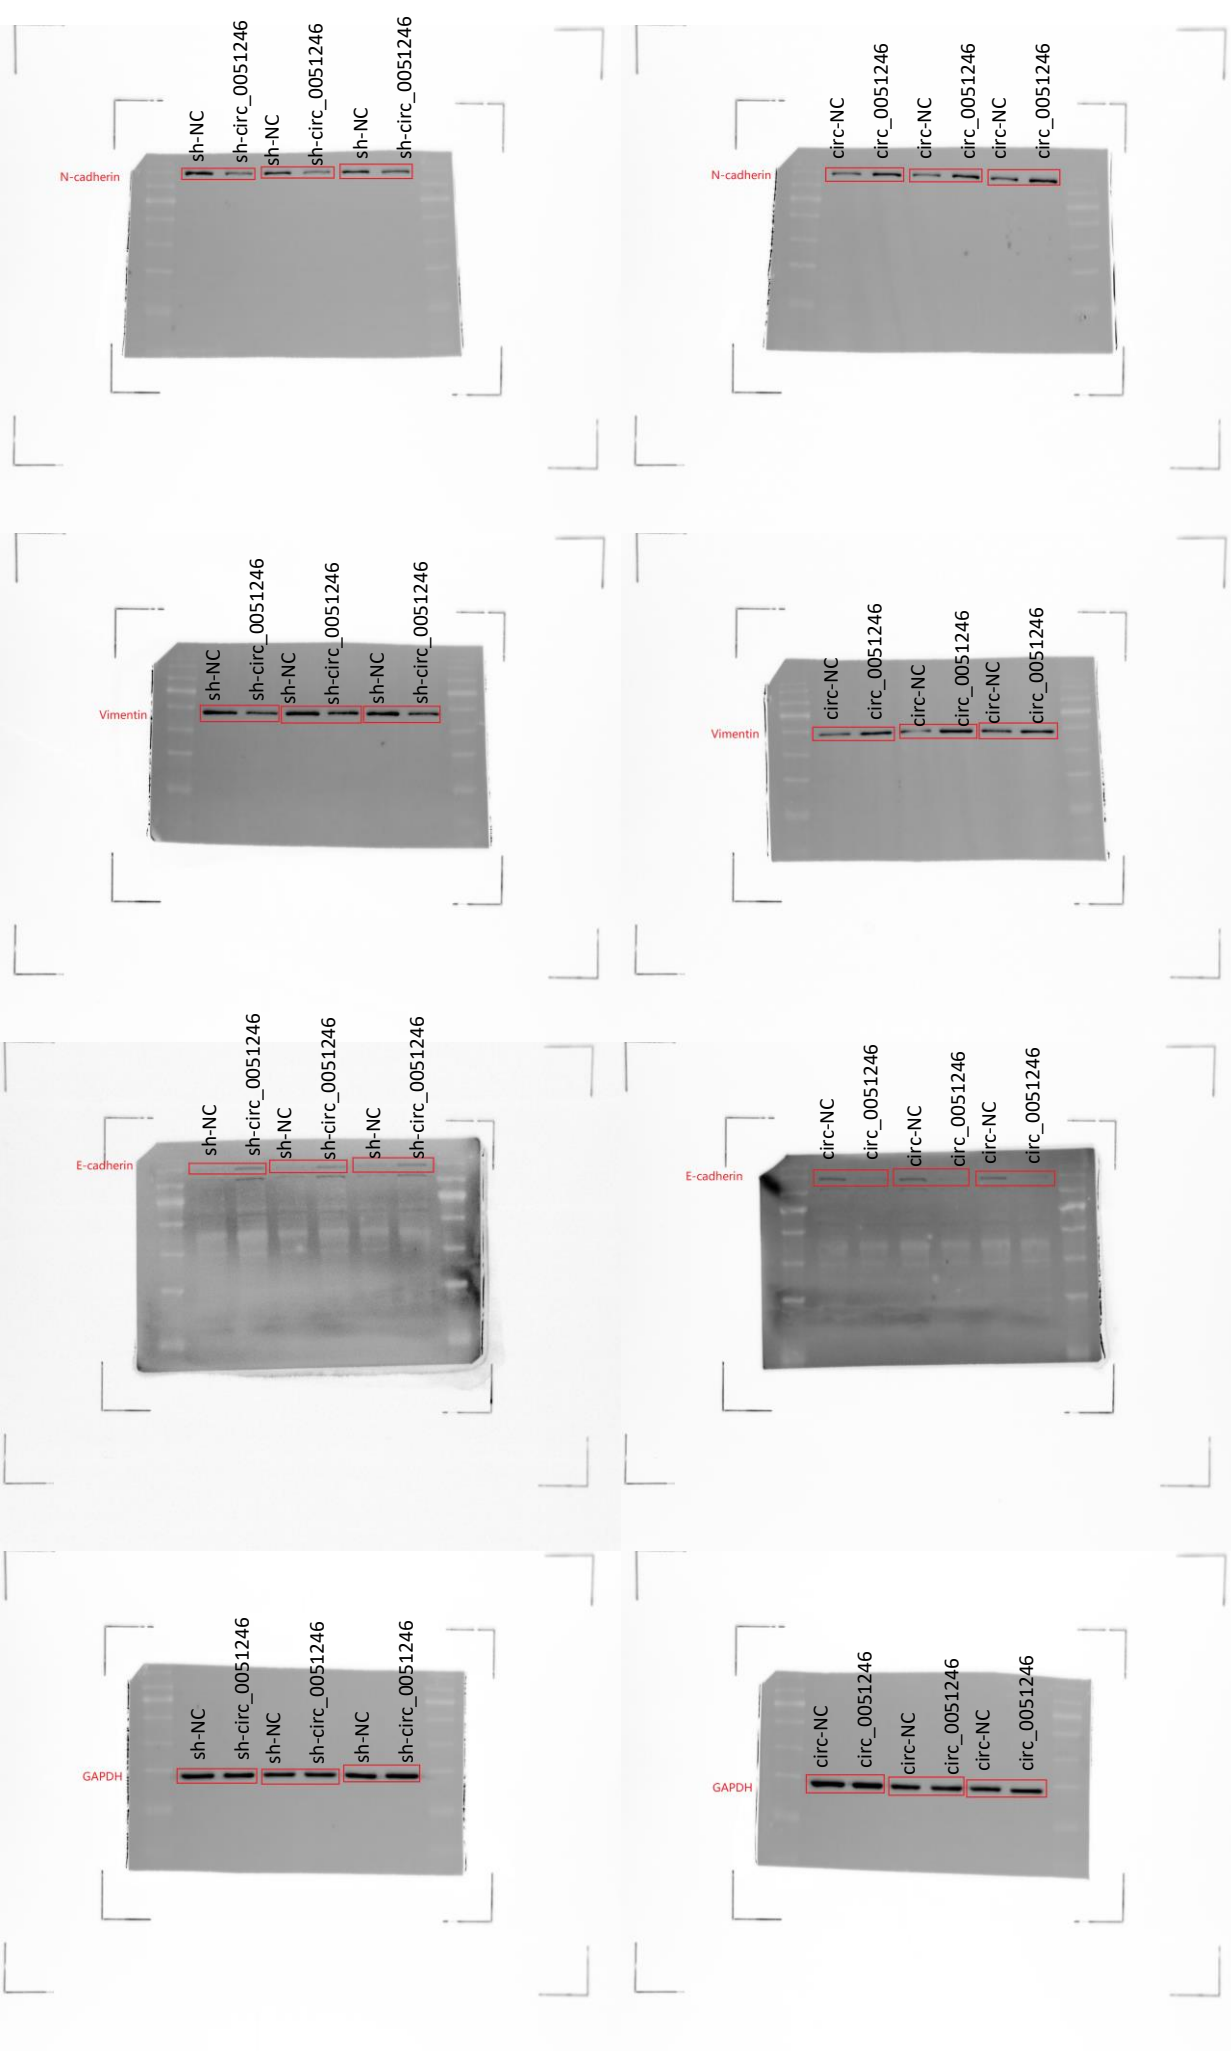

Figure 4F, G, H-YAP1, Notch 1, Jagged 1, GAPDH

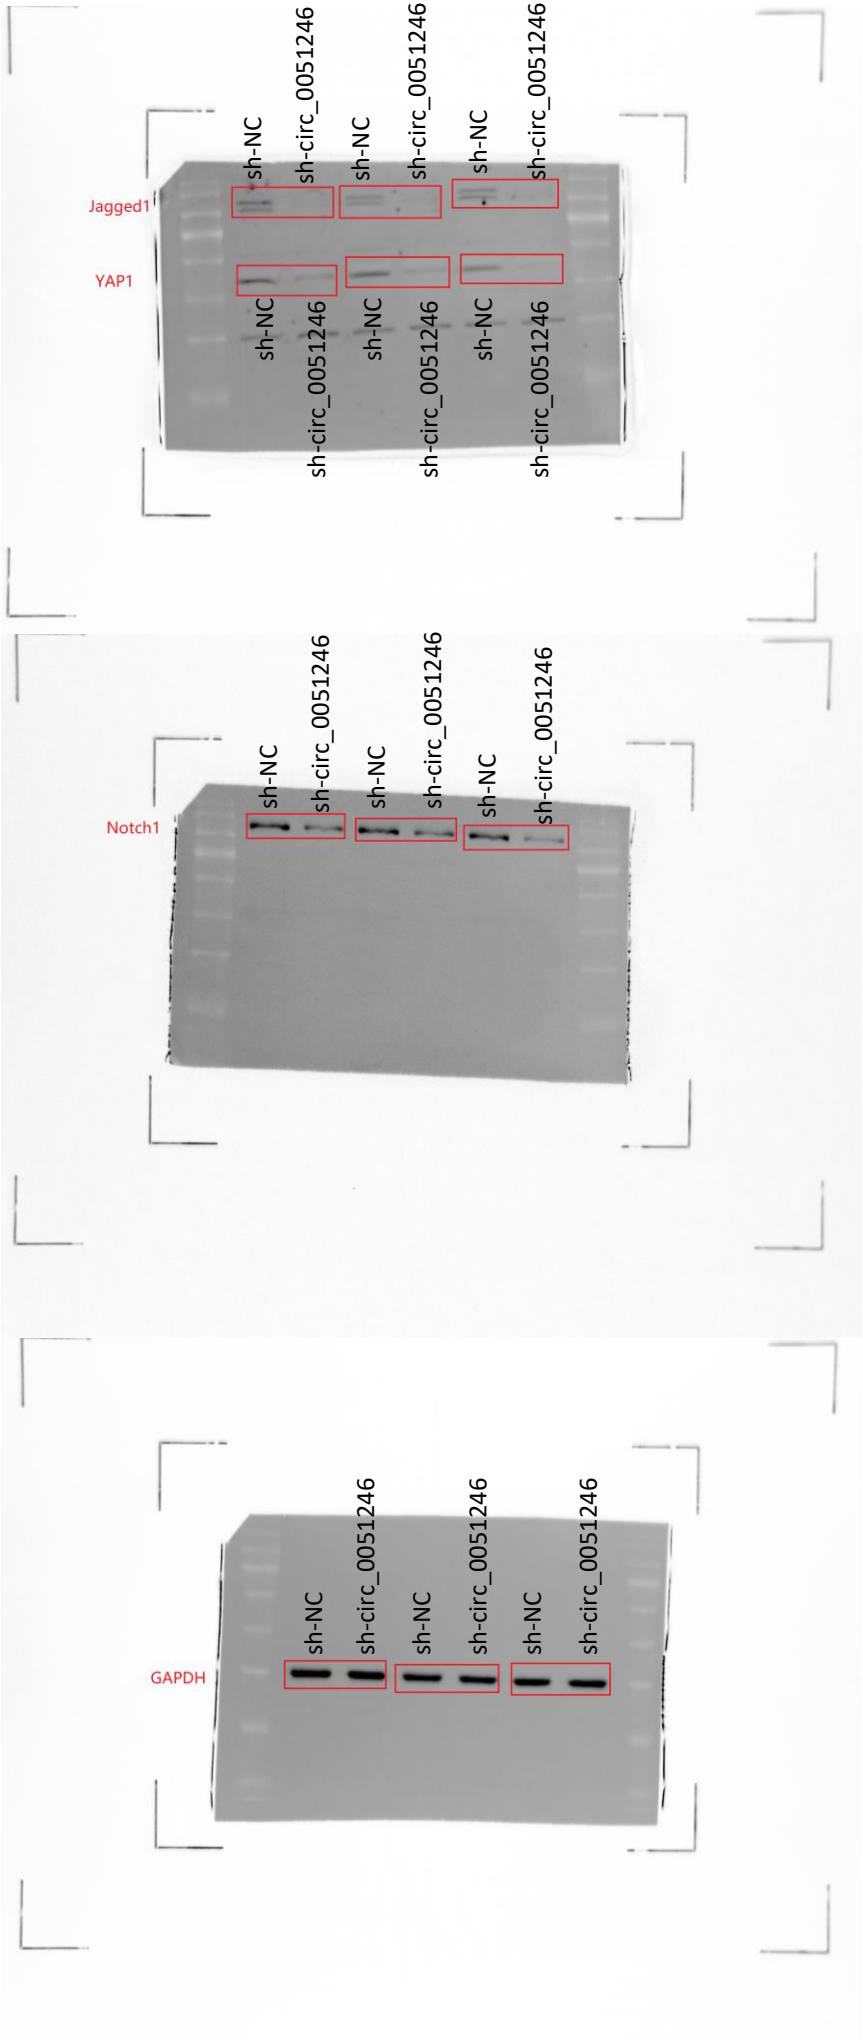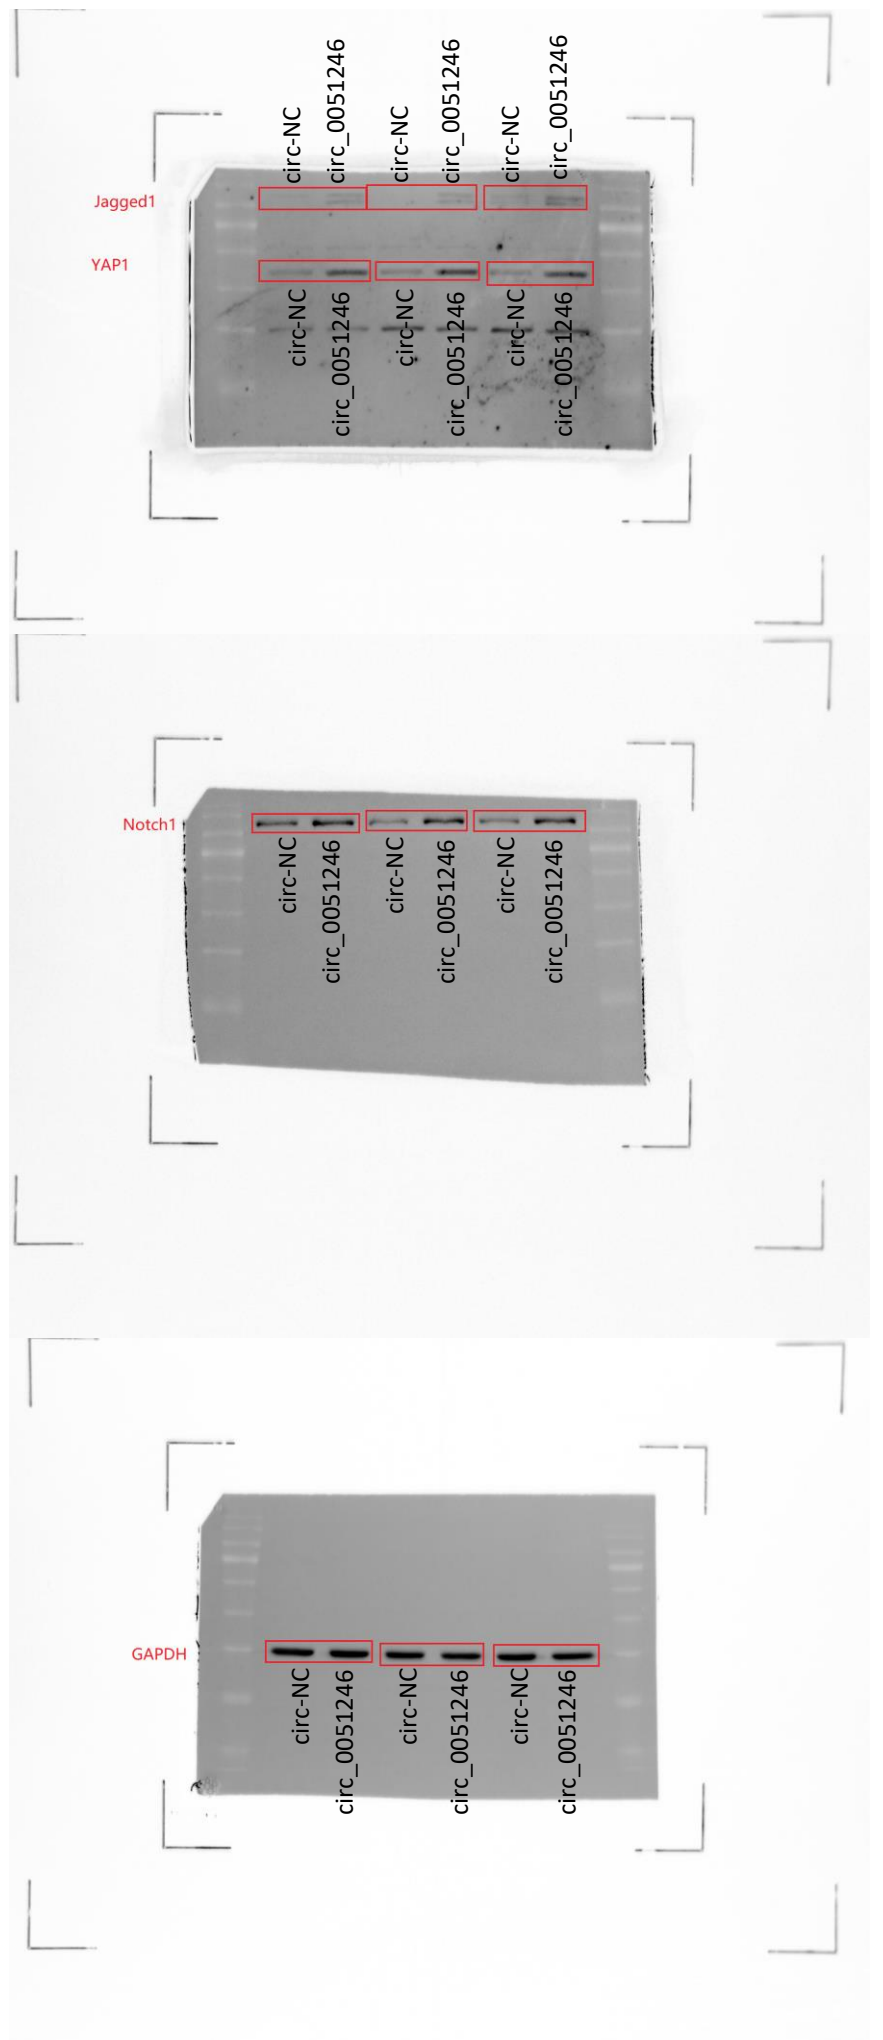

Figure 6C, D-Ki67, PCNA, Bax, Bcl-2, GAPDH; N-cadherin, Vimentin, E-cadherin, GAPDH; YAP1, Notch 1, Jagged1, GAPDH

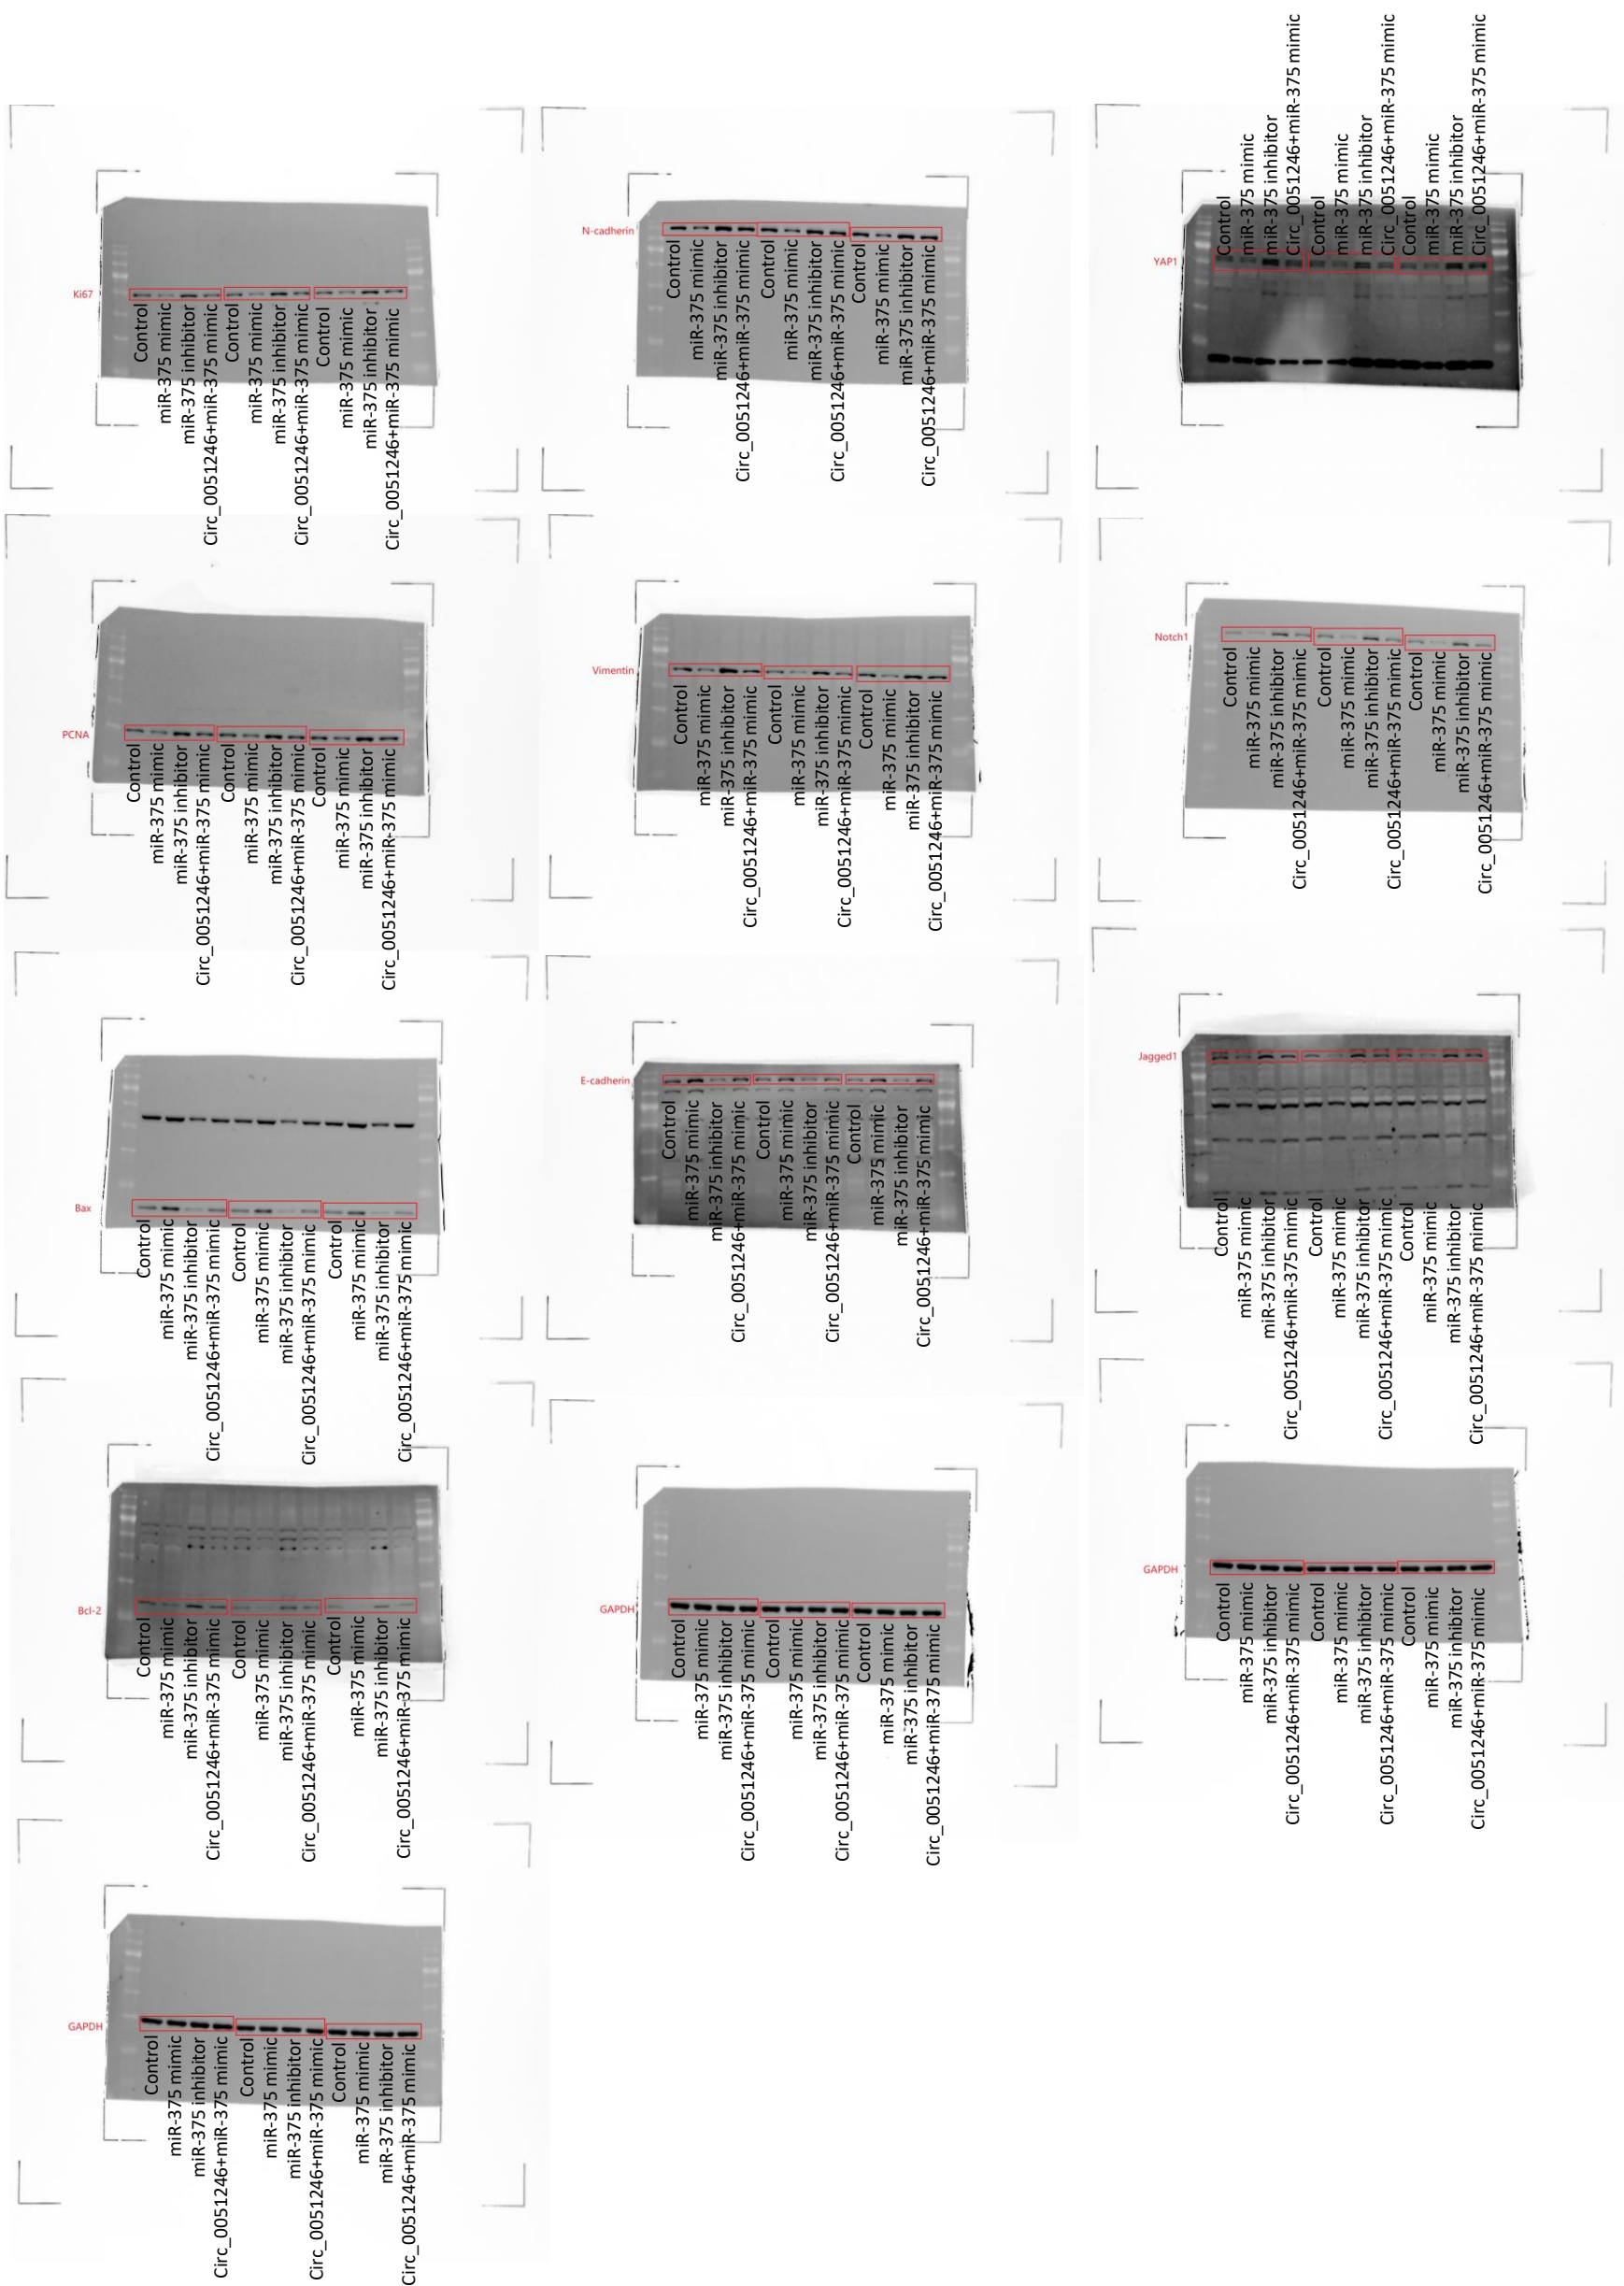

Figure 8C, D-N-cadherin, Vimentin, E-cadherin, GAPDH; YAP1, Notch 1, Jagged 1, GAPDH

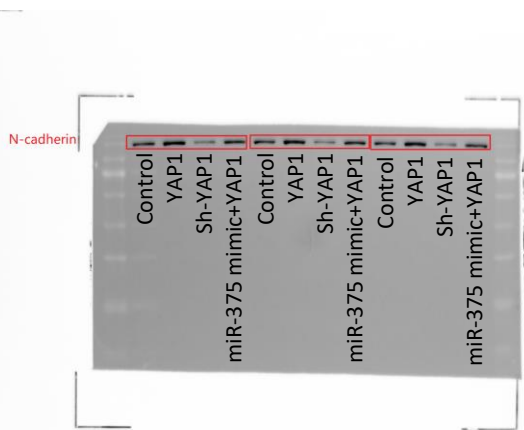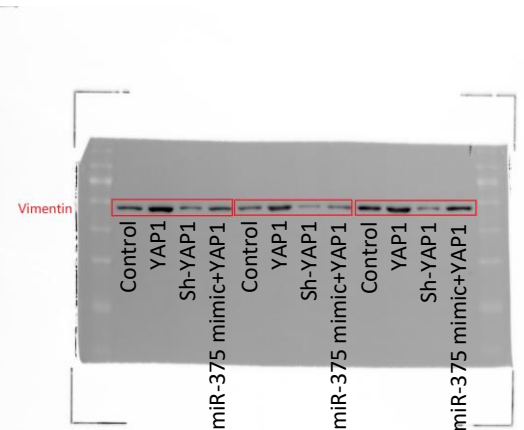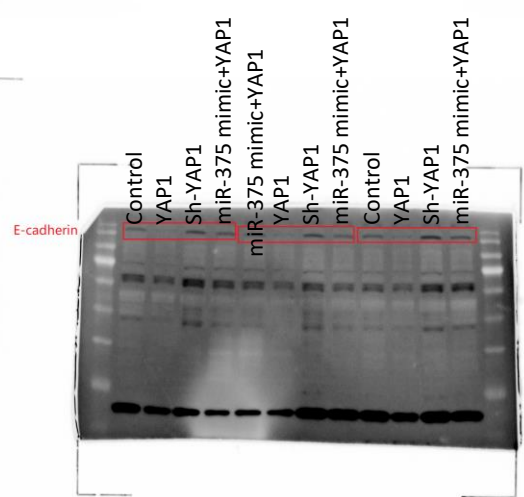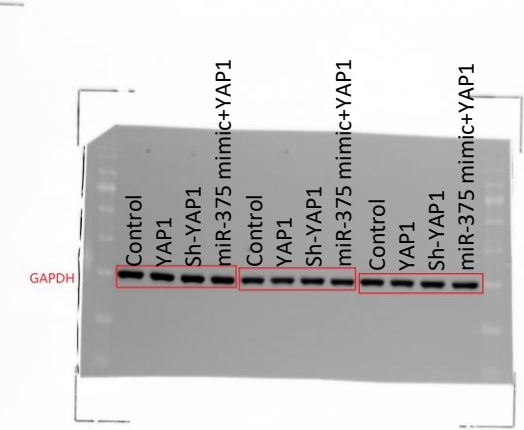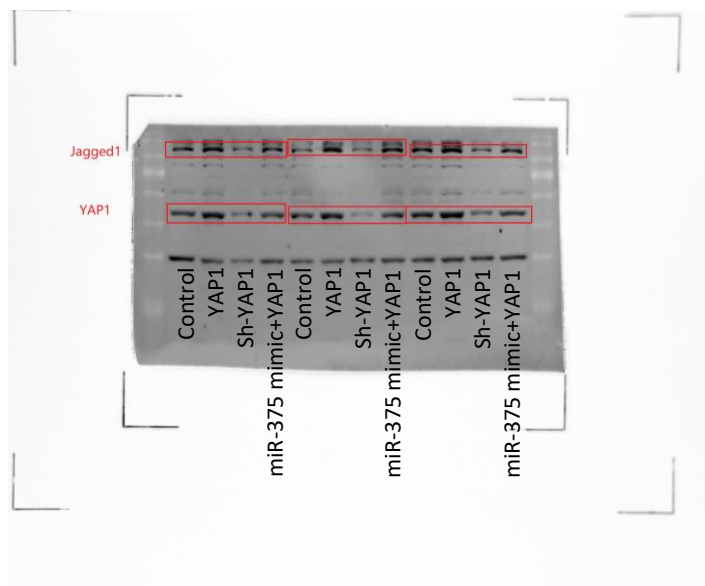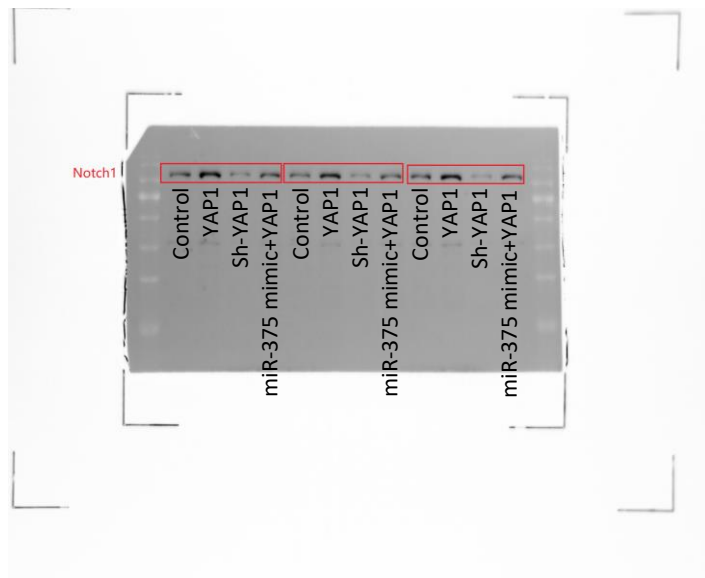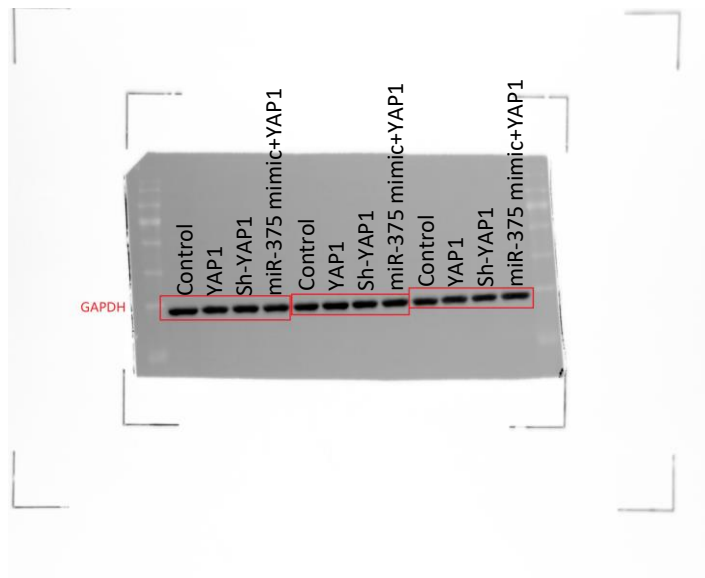

Figure 9F, G-YAP1, Notch 1, Jagged 1, GAPDH

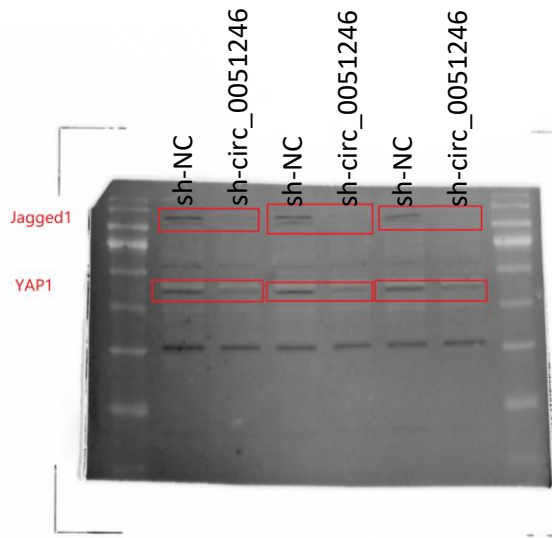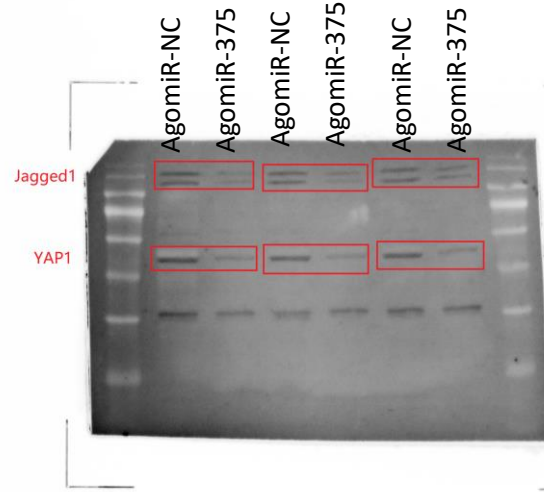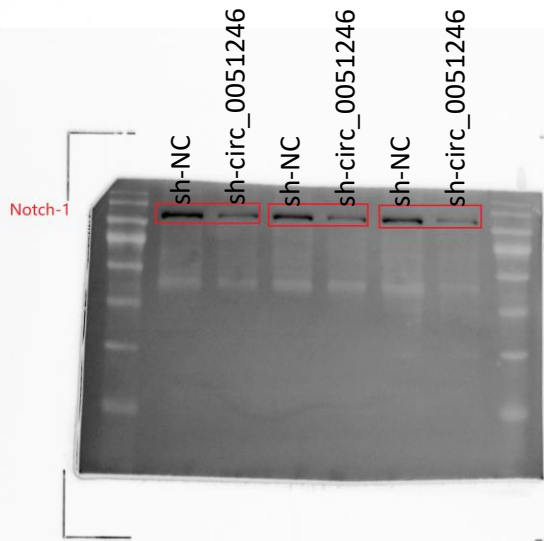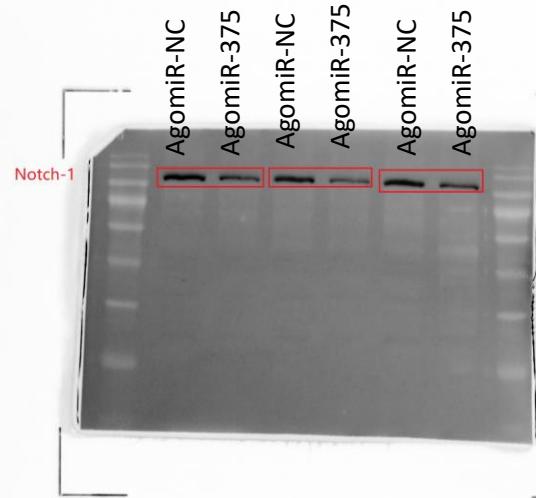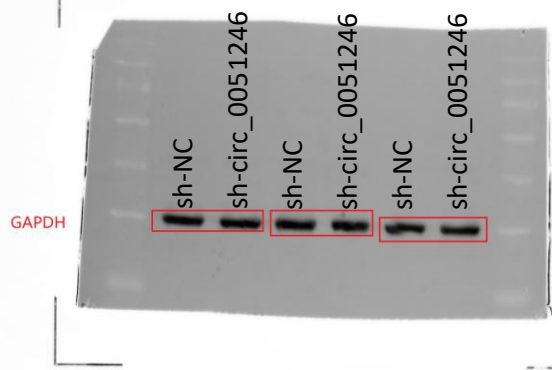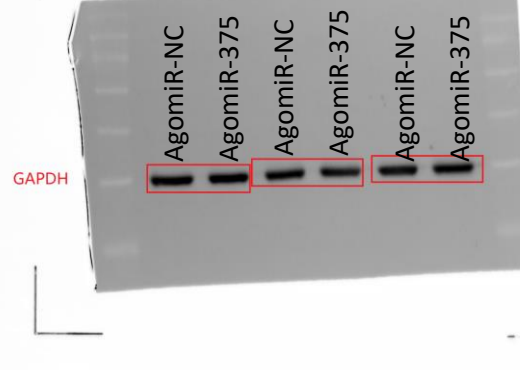

Supplement: FileS1.pdf [file FileS1.pdf]
