# Supplementary material for: Circular RNA hsa_circ_0051246 acts as a microRNA-375 sponge to promote the progression of gastric cancer stem cells via YAP1
Source: PeerJ. 2023 Nov 30;11:e16523. doi: 10.7717/peerj.16523 (PMC10950207; doi:10.7717/peerj.16523)
Supplement: File S2 [file peerj-11-16523-s003.xlsx]

## Sheet: figure2
Figure 2 Screening and identification of SGC-7901 cancer stem cells.
Figure 2A
qRT-PCR	GES	SGC 7901	AGS	amplification curve		melting curve
circ0051246	28.585	28.2067	28.4087
circ0051246	28.5472	28.2102	28.1619
circ0051246	28.3759	28.0674	28.4039
GAPDH	23.8598	25.4726	24.0845
GAPDH	24.0168	25.3962	24.1885
GAPDH	24.0134	25.3162	24.0782
Figure 2B
qRT-PCR	SGC 7901	SGC 7901 CSC	amplification curve		melting curve
circ0051246	28.3979	28.1236
circ0051246	28.5511	28.2319
circ0051246	28.4837	28.1787
GAPDH	25.8216	25.6908
GAPDH	25.8937	25.6592
GAPDH	25.9193	25.922

## Sheet: figure3
Figure 3 Circ_0051246 promoted the proliferation and self-renewal in SGC-7901 cancer stem cells.
Figure 3A
qRT-PCR	Control	si-NC	sh-circ 0051246#1	sh-circ 0051246#2	sh-circ 0051246#3	amplification curve		melting curve
circ0051246	23.1446	23.1896	23.7063	23.7881	23.931
circ0051246	23.0161	23.0908	23.4078	23.5145	24.1319
circ0051246	23.2555	22.9203	23.5011	23.6422	24.126
GAPDH	23.462	23.3754	23.3545	23.2948	23.2935
GAPDH	23.4775	23.4023	23.4092	23.2891	23.3018
GAPDH	23.4973	23.3558	23.3536	23.297	23.282
Figure 3A
qRT-PCR	Control	cir-NC	circ 0051246	amplification curve		melting curve
circ0051246	23.421	23.3948	22.6701
circ0051246	23.1431	23.1138	22.5636
circ0051246	23.2532	23.2517	22.3828
GAPDH	23.1594	23.2304	23.2396
GAPDH	23.288	23.2663	23.2537
GAPDH	23.2109	23.2194	23.4488
Figure 3B					Figure 3B				Figure 3B
CCK8	sh-NC	sh-circ 0051246	blank control		sphere formation	sh-NC	sh-circ 0051246		colony formation assay	sh-NC	sh-circ 0051246
1	0.9586	0.619	0.0574		1	56	40		1	114	61
2	0.8321	0.6738	0.0521		2	64	34		2	98	70
3	1.0028	0.6322	0.055		3	58	41		3	119	59
4	0.8281	0.766	0.0552
5	0.9754	0.6372	0.063
Figure 3C					Figure 3C				Figure 3C
CCK8	cir-NC	circ 0051246	blank control		sphere formation	cir-NC	circ 0051246		colony formation assay	cir-NC	circ 0051246
1	0.9372	1.3079	0.0428		1	61	86		1	119	175
2	1.0593	1.0186	0.0427		2	57	99		2	130	154
3	0.935	1.1824	0.051		3	68	107		3	108	187
4	0.9688	1.0784	0.0512
5	1.0684	1.226	0.0468
Figure 3F
EdU	sh-NC	sh-circ 0051246
EdU-positive cell number	124	51
	112	49
	129	59
Total cell number	259	241
	249	249
	246	252
Positive cell rate (%)	47.8764	21.1618
	44.9799	19.6787
	52.439	23.4127
Figure 3E
EdU	cir-NC	circ 0051246
EdU-positive cell number	86	151
	103	143
	114	132
Total cell number	216	251
	247	218
	251	237
Positive cell rate (%)	39.8148	60.1594
	41.7004	65.5963
	45.4183	55.6962

## Sheet: figure4
Figure 4 Circ_0051246 inhibited apoptosis and promoted cell migration and invasion in SGC-7901 cancer stem cells.
Figure 4A
flow cytometry	sh-NC	sh-circ 0051246
1	14.23	22.52
2	13.89	23.86
3	12.16	24.03
flow cytometry	cir-NC	circ 0051246
1	12.25	10.24
2	15.47	10.1
3	14.59	8.29
Figure 4B
Transwell	sh-NC	sh-circ 0051246	Transwell	sh-NC	sh-circ 0051246
migration cell number	188	56	invasion cell number	93	40
	190	67		97	34
	212	59		85	38
Figure 4C
Transwell	cir-NC	circ 0051246	Transwell	cir-NC	circ 0051246
migration cell number	199	396	invasion cell number	96	242
	169	342		94	250
	192	385		82	276
Figure 4E
wound-healing assay	24 h migration distance rate	48 h migration distance rate
si-NC	29.5373	40.8945
	34.5041	49.1439
	27.1841	46.1504
si-circ 0051246	16.0205	29.1168
	17.0011	28.3964
	13.2393	32.9146
Figure 4E
wound-healing assay	24 h migration distance rate	48 h migration distance rate
cir-NC	19.4556	34.5801
	23.1947	36.8633
	18.7418	40.9738
circ 0051246	44.683	56.3981
	38.3448	49.5225
	36.0326	46.5867

## Sheet: figure 4G,H
Figure 4 Circ_0051246 inhibited apoptosis and promoted cell migration and invasion in SGC-7901 cancer stem cells.
Figure 4F, G				Figure 4F, H
Western blot	sh-NC	sh-circ 0051246		Western blot	cir-NC	circ 0051246
Ki67/GAPDH	0.950193	0.412208		Ki67/GAPDH	0.687714	0.903508
Ki67/GAPDH	0.864364	0.368554		Ki67/GAPDH	0.629833	0.826849
Ki67/GAPDH	1.03611	0.456482		Ki67/GAPDH	0.747772	0.982373
PCNA/GAPDH	0.821705	0.278479		PCNA/GAPDH	0.429358	1.025
PCNA/GAPDH	0.751539	0.248075		PCNA/GAPDH	0.389639	0.942568
PCNA/GAPDH	0.89318	0.306888		PCNA/GAPDH	0.467716	1.10803
Bax/GAPDH	0.374074	0.82519		Bax/GAPDH	0.768607	0.314435
Bax/GAPDH	0.341944	0.753581		Bax/GAPDH	0.702835	0.281822
Bax/GAPDH	0.404927	0.895333		Bax/GAPDH	0.835448	0.346273
Bcl-2/GAPDH	0.916824	0.457622		Bcl-2/GAPDH	0.595948	0.857049
Bcl-2/GAPDH	0.838068	0.413452		Bcl-2/GAPDH	0.540397	0.781126
Bcl-2/GAPDH	0.995708	0.502182		Bcl-2/GAPDH	0.652374	0.933553
N-cadherin/GAPDH	0.781592	0.420752		N-cadherin/GAPDH	0.518782	0.831359
N-cadherin/GAPDH	0.710587	0.379886		N-cadherin/GAPDH	0.470587	0.755346
N-cadherin/GAPDH	0.852347	0.463032		N-cadherin/GAPDH	0.568974	0.905521
Vimentin/GAPDH	0.893374	0.553803		Vimentin/GAPDH	0.553948	0.946778
Vimentin/GAPDH	0.811844	0.497978		Vimentin/GAPDH	0.504034	0.86
Vimentin/GAPDH	0.973541	0.609673		Vimentin/GAPDH	0.60445	1.03513
E-cadherin/GAPDH	0.29284	0.91385		E-cadherin/GAPDH	0.826091	0.317986
E-cadherin/GAPDH	0.263648	0.825579		E-cadherin/GAPDH	0.757972	0.285677
E-cadherin/GAPDH	0.323176	1.00202		E-cadherin/GAPDH	0.893189	0.350898
YAP1/GAPDH	0.739109	0.245673		YAP1/GAPDH	0.282967	0.955981
YAP1/GAPDH	0.667625	0.221181		YAP1/GAPDH	0.254289	0.867575
YAP1/GAPDH	0.811	0.271928		YAP1/GAPDH	0.31266	1.04565
Notch 1/GAPDH	0.810552	0.386188		Notch 1/GAPDH	0.587195	0.741929
Notch 1/GAPDH	0.744419	0.347122		Notch 1/GAPDH	0.531751	0.669095
Notch 1/GAPDH	0.877959	0.425214		Notch 1/GAPDH	0.641026	0.816072
Jagged 1/GAPDH	0.861755	0.220568		Jagged 1/GAPDH	0.246685	0.811778
Jagged 1/GAPDH	0.790068	0.199187		Jagged 1/GAPDH	0.221562	0.73411
Jagged 1/GAPDH	0.933479	0.243926		Jagged 1/GAPDH	0.271796	0.89041

## Sheet: figure 5
Figure 5 The circ_0051246 inhibited the effects of miR-375 on the proliferation, self-renewal, and apoptosis in SGC-7901 cancer stem cells.
figure 5B
Dual-luciferase report assay	circ 0051246 wt-miR NC	circ 0051246 wt-miR 375	circ 0051246 mut-miR NC	circ 0051246 mut-miR 375
1	0.934289	0.380648	0.918622	1.04546
2	1.11786	0.539553	1.11436	0.843378
3	0.957952	0.487419	0.97986	1.00311
figure 5C						figure 5C
qRT-PCR	sh-NC	sh-circ 0051246	amplification curve	melting curve		qRT-PCR	cir-NC	circ 0051246	amplification curve	melting curve
miR-375	21.9868	21.1036				miR-375	22.4633	23.5528
miR-375	21.7506	21.4051				miR-375	22.415	23.4252
miR-375	21.8699	21.2236				miR-375	22.2019	23.2664
U6	19.7771	19.7955				U6	20.1961	20.2205
U6	19.862	19.92				U6	20.2401	20.2317
U6	19.8227	19.8737				U6	20.2755	20.2693
figure 5D
qRT-PCR	Control	miR 375 mimic	miR 375 inhibitor	circ 0051246 +miR 375 mimic	amplification curve		melting curve
miR-375	22.2696	22.0274	22.902	22.2049
miR-375	22.398	21.8687	22.6655	22.0469
miR-375	22.1541	21.7735	22.8965	22.3191
U6	20.6907	20.5878	20.5891	20.6017
U6	20.5229	20.6172	20.6338	20.6102
U6	20.5686	20.5824	20.661	20.5276
figure 5E
CCK8	Control	miR 375 mimic	miR 375 inhibitor	circ 0051246 +miR 375 mimic
1	111.607	67.0043	137.713	106.721
2	107.258	73.3486	155.315	124.502
3	89.8492	81.3305	126.236	117.924
4	101.492	64.2794	155.907	120.91
5	89.7941	68.8484	127.956	96.4962
figure 5F
sphere formation assay	Control	miR 375 mimic	miR 375 inhibitor	circ 0051246 +miR 375 mimic
1	60	35	94	64
2	52	40	83	58
3	57	33	81	56
figure 5G
colony formation assay	Control	miR 375 mimic	miR 375 inhibitor	circ 0051246 +miR 375 mimic
1	89	63	106	95
2	80	55	128	106
3	97	67	115	89
figure 5H
EdU	Control	miR 375 mimic	miR 375 inhibitor	circ 0051246 +miR 375 mimic
EdU-positive cell number	99	59	186	112
	114	54	224	130
	87	78	205	105
Total cell number	245	213	278	246
	259	208	289	259
	233	252	284	248
Positive cell rate (%)	40.4082	27.6995	66.9065	45.5285
	44.0154	25.9615	77.5087	50.1931
	37.3391	30.9524	72.1831	42.3387
figure 5I
flow cytometry	Control	miR 375 mimic	miR 375 inhibitor	circ 0051246 +miR 375 mimic
1	15.63	21.76	10.06	18.13
2	16.39	29.21	10.22	18.09
3	17.39	26.86	9.22	16.49

## Sheet: figure 6
Figure 6 The circ_0051246 inhibited the effects of miR-375 on cell migration, invasion, and related proteins in gastric CSCs.
Figure 6A
Transwell	Control	miR 375 mimic	miR 375 inhibitor	circ 0051246 +miR 375 mimic	Transwell	Control	miR 375 mimic	895	circ 0051246 +miR 375 mimic
migration cell number	213	56	312	204	invasion cell number	101	30	255	125
	191	52	340	216		113	33	224	114
	225	61	368	241		106	35	262	110
Figure 6B
wound-healing assay	24 h migration distance rate	48 h migration distance rate
Control	23.1732	38.1193
	21.5566	44.873
	26.4233	45.0732
miR-375 mimic	16.937	29.4562
	13.7752	24.1408
	13.4967	23.5389
miR-375 inhibitor	34.3501	63.9103
	41.0198	76.6246
	43.3139	70.9173
circ 0051246 +miR-375 mimic	20.8604	34.4859
	25.4221	44.5014
	21.6272	40.3645

## Sheet: figure 6C,D,E,F
Figure 6 The circ_0051246 inhibited the effects of miR-375 on cell migration, invasion, and related proteins in gastric CSCs.
figure 6C,D,E,F
Western blot	Control	miR 375 mimic	miR 375 inhibitor	circ 0051246 +miR 375 mimic
Ki67/GAPDH	0.580494	0.270113	0.920034	0.561477
Ki67/GAPDH	0.524616	0.240739	0.837232	0.504584
Ki67/GAPDH	0.634182	0.299353	1.00315	0.616157
PCNA/GAPDH	0.532242	0.365034	0.905748	0.654369
PCNA/GAPDH	0.480444	0.329201	0.814871	0.595755
PCNA/GAPDH	0.582973	0.401652	0.996819	0.713089
Bax/GAPDH	0.481893	0.940364	0.18385	0.470452
Bax/GAPDH	0.43605	0.863318	0.165416	0.421856
Bax/GAPDH	0.529055	1.01578	0.202772	0.517533
Bcl-2/GAPDH	0.457582	0.24341	0.901263	0.549806
Bcl-2/GAPDH	0.412457	0.221743	0.818891	0.497767
Bcl-2/GAPDH	0.503068	0.264748	0.982124	0.602269
N-cadherin/GAPDH	0.999317	0.741679	1.42812	1.16789
N-cadherin/GAPDH	0.899377	0.660611	1.29617	1.05109
N-cadherin/GAPDH	1.10131	0.821086	1.55878	1.28302
Vimentin/GAPDH	1	0.541	1.798	0.931
Vimentin/GAPDH	0.893	0.483	1.654	0.841
Vimentin/GAPDH	1.107	0.599	1.947	1.02
E-cadherin/GAPDH	0.999	1.626	0.466	1.04
E-cadherin/GAPDH	0.903	1.476	0.416	0.93
E-cadherin/GAPDH	1.098	1.777	0.514	1.149
YAP1/GAPDH	0.999	0.669	1.4	1.009
YAP1/GAPDH	0.9	0.597	1.282	0.91
YAP1/GAPDH	1.101	0.742	1.517	1.109
Notch 1/GAPDH	1.002	0.672	2.14	1.141
Notch 1/GAPDH	0.897	0.61	1.962	1.028
Notch 1/GAPDH	1.101	0.732	2.315	1.254
Jagged 1/GAPDH	0.999	0.607	1.878	1.24
Jagged 1/GAPDH	0.909	0.541	1.718	1.112
Jagged 1/GAPDH	1.092	0.675	2.038	1.365

## Sheet: figure 7
Figure 7 The miR-375 inhibited the effects of YAP1 on the proliferation, self-renewal, and apoptosis in SGC-7901 cancer stem cells.
Figure 7A						Figure 7A
qRT-PCR	si-NC	si-circ 0051246	amplification curve	melting curve		qRT-PCR	cir-NC	circ 0051246	amplification curve	melting curve
YAP1	20.8811	21.5565				YAP1	21.122	20.2788
YAP1	20.8675	21.6885				YAP1	20.8812	20.4254
YAP1	21.1094	21.441				YAP1	21.0104	20.512
GAPDH	19.8577	19.7356				GAPDH	20.0415	19.7592
GAPDH	19.8964	19.7294				GAPDH	20.059	19.7786
GAPDH	19.9764	19.7842				GAPDH	20.0739	19.8633
Figure 7B
qRT-PCR	Control	miR 375 mimic	miR 375 inhibitor	circ 0051246 +miR 375 mimic	amplification curve	melting curve
YAP1	20.6873	21.47	20.5555	20.8037
YAP1	20.8045	21.2812	20.3021	21.0363
YAP1	20.9626	21.2197	20.4068	20.7294
GAPDH	19.5714	19.6709	19.5769	19.5637
GAPDH	19.6667	19.6898	19.6596	19.5386
GAPDH	19.5798	19.4785	19.5183	19.577
Figure 7C
qRT-PCR	Control	YAP1	si-YAP1	miR 375 mimic +YAP1	amplification curve	melting curve
YAP1	20.8086	20.2482	22.0014	20.6913
YAP1	20.6967	20.3273	21.8538	20.8118
YAP1	20.9778	20.5338	21.7298	20.9261
GAPDH	19.8459	19.6997	19.8229	19.6465
GAPDH	19.7689	19.6442	19.819	19.69
GAPDH	19.8934	20.6185	19.8965	19.8183
Figure 7D
Dual-luciferase report assay.	miR 375 wt-NC	miR 375 wt-YAP1	miR 375 mut-NC	miR 375 mut-YAP1
1	0.926404	0.391584	1.14259	1.16206
2	1.10278	0.579833	0.929759	1.03622
3	0.978821	0.57623	0.95624	0.939459
Figure 7F
CCK8	Control	YAP1	si-YAP1	miR 375 mimic +YAP1
1	89.1844	138.159	57.5301	109.237
2	102.392	148.125	56.0892	95.9685
3	113.754	125.326	62.6182	91.3007
4	104.494	116.096	64.3292	120.193
5	90.175	123.285	73.77	118.827
Figure 7G
sphere formation	Control	YAP1	si-YAP1	miR 375 mimic +YAP1
1	64	88	47	63
2	71	99	43	71
3	60	102	52	74
Figure 7I
colony formation assay	Control	YAP1	sh-YAP1	miR 375 mimic +YAP1
1	98	122	69	100
2	89	145	65	107
3	103	138	57	91
Figure 7K
EdU	Control	YAP1	sh-YAP1	miR 375 mimic +YAP1
EdU-positive cell number	110	174	64	98
	104	212	50	80
	98	176	53	127
Total cell number	291	229	239	237
	269	258	207	208
	282	251	235	283
Positive cell rate (%)	37.8007	75.9825	26.7782	41.3502
	38.6617	82.1705	24.1546	38.4615
	34.7518	70.1195	22.5532	44.8763
Figure 7K
flow cytometry	Control	YAP1	sh-YAP1	miR 375 mimic +YAP1
1	15.25	5.04	23.68	17.6
2	12.89	5.52	27.5	13.37
3	13.71	4.66	25.3	17.95

## Sheet: figure 8
Figure 8 The miR-375 inhibited the effects of YAP1 on cell migration, invasion, and related proteins in SGC-7901 cancer stem cells.
Figure 8A
Transwell	Control	YAP1	sh-YAP1	miR 375 mimic +YAP1	Transwell	Control	YAP1	sh-YAP1	miR 375 mimic +YAP1
migration cell number	168	282	66	198	invasion cell number	105	234	19	121
	179	326	71	175		114	271	21	103
	201	312	77	206		96	248	24	114
Figure 8B
wound-healing assay	24 h migration distance rate	48 h migration distance rate
Control	21.5828	34.9184
	22.245	28.9589
	27.1182	33.1352
YAP1	33.8972	59.2632
	37.4604	66.7921
	29.7575	63.9177
sh-YAP1	10.4485	19.2338
	9.51909	16.8812
	11.0882	19.3317
miR 375 mimic +YAP1	21.7983	25.2886
	18.4613	24.8769
	24.0778	31.5052

## Sheet: figure 8CD
Figure 8 The miR-375 inhibited the effects of YAP1 on cell migration, invasion, and related proteins in SGC-7901 cancer stem cells.
Figure 8CD
Western blot	Control	YAP1	sh-YAP1	miR 375 mimic +YAP1
N-cadherin/GAPDH	0.642744	0.91252	0.317273	0.700953
N-cadherin/GAPDH	0.705505	0.994414	0.34839	0.759513
N-cadherin/GAPDH	0.581105	0.832862	0.28586	0.643028
Vimentin/GAPDH	0.559992	1.04272	0.340764	0.578486
Vimentin/GAPDH	0.61482	1.12953	0.377172	0.628191
Vimentin/GAPDH	0.504918	0.955803	0.305495	0.528074
E-cadherin/GAPDH	0.578902	0.207911	0.896723	0.700207
E-cadherin/GAPDH	0.632883	0.227643	0.981167	0.76636
E-cadherin/GAPDH	0.525977	0.188755	0.813206	0.63413
YAP1/GAPDH	0.596061	0.965213	0.319181	0.591075
YAP1/GAPDH	0.538292	0.878152	0.285393	0.533122
YAP1/GAPDH	0.653871	1.05168	0.351133	0.647936
Notch 1/GAPDH	0.348922	0.740645	0.154129	0.415546
Notch 1/GAPDH	0.313289	0.670605	0.138825	0.374694
Notch 1/GAPDH	0.385968	0.812494	0.17001	0.457192
Jagged 1/GAPDH	0.509899	0.6619	0.333462	0.558693
Jagged 1/GAPDH	0.463316	0.594137	0.301258	0.510832
Jagged 1/GAPDH	0.556195	0.731333	0.363242	0.606532

[truncated: 2 more sheets: figure 9, figure 9FGH]
