# Supplementary material for: Circular RNA hsa_circ_0051246 acts as a microRNA-375 sponge to promote the progression of gastric cancer stem cells via YAP1
Source: PeerJ. 2023 Nov 30;11:e16523. doi: 10.7717/peerj.16523 (PMC10950207; doi:10.7717/peerj.16523)
Supplement: File S3 [file peerj-11-16523-s004.xlsx]

## Sheet: figure1A
Figure 1A Heatmap of 26 different expression (DE) circRNA with |Log2fold change|³2.0 and P-value<0.05 in microarray GSE83521.
	Figure 1A
id	GSM2205869	GSM2205874	GSM2205877	GSM2205876	GSM2205879	GSM2205875	GSM2205878	GSM2205873	GSM2205868	GSM2205872	GSM2205870	GSM2205871
hsa_circRNA_100269	7.17351	10.7548	10.7374	10.2864	11.8857	11.0799	12.2376	11.9599	7.45417	9.79602	8.89901	8.1634
hsa_circRNA_101308	12.1745	9.57853	7.88484	6.82293	7.50514	6.93478	6.67568	7.80645	12.4663	8.71501	9.36335	8.99164
hsa_circRNA_102592	8.69092	6.70262	7.69268	6.11928	7.99009	6.5422	6.60748	9.39344	11.1397	10.6384	10.369	10.3219
hsa_circRNA_104589	8.53092	7.34712	7.6078	6.19347	7.13676	7.33621	6.76541	9.03608	9.66616	9.20693	9.04094	9.157
hsa_circRNA_101471	8.17177	7.61687	7.14556	8.07325	7.11393	7.57754	7.28513	9.59171	12.0947	11.0349	11.3153	11.0434
hsa_circRNA_104915	6.33436	6.40353	6.33436	6.37232	6.49951	6.10265	6.11484	8.70162	9.78751	9.80589	9.57232	9.56718
hsa_circRNA_102191	6.88588	6.29563	6.37043	6.53106	6.28359	6.1625	6.1711	9.69389	12.0448	11.1127	11.352	11.1495
hsa_circRNA_102584	6.19571	5.81722	5.75247	6.1475	5.98607	6.02288	5.97744	8.55284	9.95795	9.2897	9.4195	9.24597
hsa_circRNA_102615	8.37765	8.72624	8.92537	8.68102	8.70712	9.35167	8.92397	11.4182	14.0428	13.277	13.1786	13.4078
hsa_circRNA_103594	6.86224	7.31221	7.16296	7.46764	7.44402	7.2679	7.42141	9.49528	11.1863	10.7071	10.9419	10.6985
hsa_circRNA_102614	6.74241	6.58325	6.50158	6.83644	6.67099	6.54154	6.58954	11.0188	13.6189	12.883	13.0842	12.9014
hsa_circRNA_103122	6.45399	6.63029	6.39255	6.70968	6.57092	6.74495	6.64397	10.6309	12.8314	12.1749	12.2326	12.3192
hsa_circRNA_100984	7.58943	7.53714	7.49944	7.93916	7.89336	7.40308	7.73916	10.5099	13.0477	12.2402	11.8259	12.0519
hsa_circRNA_102777	6.02207	6.25639	6.22556	6.56055	6.26209	6.45796	6.25034	9.16431	11.9192	10.5479	10.4821	10.2596
hsa_circRNA_102561	5.459	5.4818	5.5013	5.76193	5.72502	5.487	5.45778	8.41658	10.6589	9.58617	9.61688	9.44792
hsa_circRNA_103783	6.32989	6.98152	7.03762	8.04789	7.31123	6.89341	6.81902	9.09807	11.2653	10.2442	10.1605	10.1528
hsa_circRNA_104807	6.12219	6.72475	6.75205	6.28101	6.34563	6.31773	6.63843	8.79647	12.3335	10.0135	10.0654	10.0262
hsa_circRNA_100385	6.21414	6.69068	6.33194	6.51447	6.75979	6.69396	6.66619	9.25005	11.7056	10.1809	9.67167	9.68805
hsa_circRNA_102815	5.7569	5.77302	5.74502	5.91513	5.98345	5.72171	5.82388	8.40119	10.5038	9.14986	8.89752	8.97904
hsa_circRNA_101309	6.51582	6.76245	6.36209	6.83316	6.87162	6.53682	6.72438	9.12162	10.8135	9.60492	9.61811	9.49673
hsa_circRNA_103559	6.62848	7.04869	7.94898	6.48725	6.7612	6.62073	7.63153	9.72807	12.0752	11.1771	11.1914	11.0286
hsa_circRNA_100267	6.33442	5.85065	6.31282	5.37525	5.57136	5.6242	6.29019	8.09798	8.71749	8.61256	9.03882	8.55254
hsa_circRNA_101909	5.42034	5.36128	5.01354	5.65275	5.67953	5.41546	5.55096	7.2873	7.72235	7.86214	8.86399	7.91389
hsa_circRNA_103053	6.15015	6.35801	6.17664	6.53734	6.31712	6.28099	6.39365	9.27191	9.43147	9.0478	9.10759	9.00485
hsa_circRNA_104947	6.28608	6.66412	6.1769	6.64991	6.79004	6.41035	6.36181	8.96412	9.84864	9.69495	9.78751	9.79077
hsa_circRNA_102571	5.68127	6.27373	5.98152	6.27301	6.77658	6.20506	6.28375	8.80691	9.64373	9.65779	9.67239	9.5826

## Sheet: figure 1B
Figure 1B Network diagram of 26 DE circRNA (green) and their predicted miRNA (blue and yellow) were 196.
Figure 1B
The gene lists were used in Cytocape
circRNA	miRNA
hsa_circ_0001789	hsa-miR-1208
hsa_circ_0001789	hsa-miR-1243
hsa_circ_0001789	hsa-miR-1246
hsa_circ_0001789	hsa-miR-1248
hsa_circ_0001789	hsa-miR-1286
hsa_circ_0001789	hsa-miR-1288
hsa_circ_0001789	hsa-miR-1290
hsa_circ_0001789	hsa-miR-1305
hsa_circ_0001789	hsa-miR-140-3p
hsa_circ_0001789	hsa-miR-149
hsa_circ_0001789	hsa-miR-548g
hsa_circ_0001789	hsa-miR-578
hsa_circ_0001789	hsa-miR-583
hsa_circ_0001789	hsa-miR-658
hsa_circ_0001789	hsa-miR-890
hsa_circ_0052001	hsa-miR-1184
hsa_circ_0052001	hsa-miR-1204
hsa_circ_0002570	hsa-miR-1231
hsa_circ_0002570	hsa-miR-1243
hsa_circ_0002570	hsa-miR-1246
hsa_circ_0002570	hsa-miR-1261
hsa_circ_0002570	hsa-miR-136
hsa_circ_0002570	hsa-miR-140-3p
hsa_circ_0002570	hsa-miR-326
hsa_circ_0002570	hsa-miR-330-5p
hsa_circ_0002570	hsa-miR-346
hsa_circ_0002570	hsa-miR-383
hsa_circ_0002570	hsa-miR-432
hsa_circ_0002570	hsa-miR-513a-5p
hsa_circ_0002570	hsa-miR-516b
hsa_circ_0002570	hsa-miR-545
hsa_circ_0002570	hsa-miR-587
hsa_circ_0002570	hsa-miR-1270
hsa_circ_0002570	hsa-miR-620
hsa_circ_0002570	hsa-miR-630
hsa_circ_0002570	hsa-miR-651
hsa_circ_0002570	hsa-miR-660
hsa_circ_0002570	hsa-miR-885-5p
hsa_circ_0002570	hsa-miR-889
hsa_circ_0002570	hsa-miR-935
hsa_circ_0045602	hsa-miR-1184
hsa_circ_0045602	hsa-miR-1203
hsa_circ_0045602	hsa-miR-1248
hsa_circ_0045602	hsa-miR-1264
hsa_circ_0045602	hsa-miR-198
hsa_circ_0045602	hsa-miR-370
hsa_circ_0045602	hsa-miR-375
hsa_circ_0045602	hsa-miR-513a-5p
hsa_circ_0045602	hsa-miR-619
hsa_circ_0045602	hsa-miR-659
hsa_circ_0045602	hsa-miR-877
hsa_circ_0045602	hsa-miR-942
hsa_circ_0034398	hsa-miR-1238
hsa_circ_0034398	hsa-miR-1253
hsa_circ_0034398	hsa-miR-1272
hsa_circ_0034398	hsa-miR-1322
hsa_circ_0034398	hsa-miR-136
hsa_circ_0034398	hsa-miR-182
hsa_circ_0034398	hsa-miR-197
hsa_circ_0034398	hsa-miR-486-3p
hsa_circ_0034398	hsa-miR-615-3p
hsa_circ_0034398	hsa-miR-665
hsa_circ_0034398	hsa-miR-766
hsa_circ_0003146	hsa-miR-1234
hsa_circ_0003146	hsa-miR-1272
hsa_circ_0003146	hsa-miR-1276
hsa_circ_0003146	hsa-miR-147b
hsa_circ_0003146	hsa-miR-197
hsa_circ_0003146	hsa-miR-210
hsa_circ_0003146	hsa-miR-339-3p
hsa_circ_0003146	hsa-miR-370
hsa_circ_0003146	hsa-miR-486-3p
hsa_circ_0003146	hsa-miR-523
hsa_circ_0003146	hsa-miR-589
hsa_circ_0003146	hsa-miR-604
hsa_circ_0003146	hsa-miR-653
hsa_circ_0003146	hsa-miR-766
hsa_circ_0003146	hsa-miR-933
hsa_circ_0006089	hsa-miR-1206
hsa_circ_0006089	hsa-miR-1286
hsa_circ_0006089	hsa-miR-1288
hsa_circ_0006089	hsa-miR-203
hsa_circ_0006089	hsa-miR-217
hsa_circ_0006089	hsa-miR-223
hsa_circ_0006089	hsa-miR-324-5p
hsa_circ_0006089	hsa-miR-330-3p
hsa_circ_0006089	hsa-miR-361-3p
hsa_circ_0006089	hsa-miR-432
hsa_circ_0006089	hsa-miR-488
hsa_circ_0006089	hsa-miR-507
hsa_circ_0006089	hsa-miR-557
hsa_circ_0006089	hsa-miR-515-5p
hsa_circ_0006089	hsa-miR-566
hsa_circ_0006089	hsa-miR-586
hsa_circ_0006089	hsa-miR-598
hsa_circ_0006089	hsa-miR-616
hsa_circ_0006089	hsa-miR-646
hsa_circ_0006089	hsa-miR-657
hsa_circ_0006089	hsa-miR-766
hsa_circ_0006089	hsa-miR-942
hsa_circ_0088485	hsa-miR-1234
hsa_circ_0088485	hsa-miR-1248
hsa_circ_0088485	hsa-miR-1299
hsa_circ_0088485	hsa-miR-198
hsa_circ_0088485	hsa-miR-335
hsa_circ_0088485	hsa-miR-338-3p
hsa_circ_0088485	hsa-miR-450b-3p
hsa_circ_0088485	hsa-miR-769-3p
hsa_circ_0088485	hsa-miR-486-3p
hsa_circ_0088485	hsa-miR-503
hsa_circ_0088485	hsa-miR-644
hsa_circ_0088485	hsa-miR-663b
hsa_circ_0088485	hsa-miR-940
hsa_circ_0004339	hsa-miR-1205
hsa_circ_0004339	hsa-miR-1231
hsa_circ_0004339	hsa-miR-1236
hsa_circ_0004339	hsa-miR-1238
hsa_circ_0004339	hsa-miR-1248
hsa_circ_0004339	hsa-miR-1253
hsa_circ_0004339	hsa-miR-1277
hsa_circ_0004339	hsa-miR-1287
hsa_circ_0004339	hsa-miR-1304
hsa_circ_0004339	hsa-miR-149
hsa_circ_0004339	hsa-miR-184
hsa_circ_0004339	hsa-miR-224
hsa_circ_0004339	hsa-miR-330-3p
hsa_circ_0004339	hsa-miR-370
hsa_circ_0004339	hsa-miR-450b-3p
hsa_circ_0004339	hsa-miR-769-3p
hsa_circ_0004339	hsa-miR-492
hsa_circ_0004339	hsa-miR-545
hsa_circ_0004339	hsa-miR-548g
hsa_circ_0004339	hsa-miR-548l
hsa_circ_0004339	hsa-miR-548m
hsa_circ_0004339	hsa-miR-561
hsa_circ_0004339	hsa-miR-577
hsa_circ_0004339	hsa-miR-579
hsa_circ_0004339	hsa-miR-580
hsa_circ_0004339	hsa-miR-607
hsa_circ_0004339	hsa-miR-1270
hsa_circ_0004339	hsa-miR-620
hsa_circ_0004339	hsa-miR-626
hsa_circ_0004339	hsa-miR-636
hsa_circ_0004339	hsa-miR-638
hsa_circ_0004339	hsa-miR-640
hsa_circ_0004339	hsa-miR-654-3p
hsa_circ_0004339	hsa-miR-668
hsa_circ_0004339	hsa-miR-874
hsa_circ_0004339	hsa-miR-942
hsa_circ_0007094	hsa-miR-1205
hsa_circ_0007094	hsa-miR-1236
hsa_circ_0007094	hsa-miR-140-3p
hsa_circ_0007094	hsa-miR-382
hsa_circ_0007094	hsa-miR-409-3p
hsa_circ_0007094	hsa-miR-431
hsa_circ_0007094	hsa-miR-520g
hsa_circ_0007094	hsa-miR-520h
hsa_circ_0007094	hsa-miR-548k
hsa_circ_0007094	hsa-miR-548l
hsa_circ_0007094	hsa-miR-548p
hsa_circ_0007094	hsa-miR-558
hsa_circ_0007094	hsa-miR-586
hsa_circ_0007094	hsa-miR-593
hsa_circ_0007094	hsa-miR-618
hsa_circ_0007094	hsa-miR-635
hsa_circ_0007094	hsa-miR-657
hsa_circ_0007094	hsa-miR-766
hsa_circ_0051246	hsa-miR-155
hsa_circ_0051246	hsa-miR-198
hsa_circ_0051246	hsa-miR-223
hsa_circ_0051246	hsa-miR-338-3p
hsa_circ_0051246	hsa-miR-375
hsa_circ_0051246	hsa-miR-576-5p
hsa_circ_0051246	hsa-miR-578
hsa_circ_0051246	hsa-miR-1827
hsa_circ_0051246	hsa-miR-885-3p
hsa_circ_0002019	hsa-miR-1184
hsa_circ_0002019	hsa-miR-1224-3p
hsa_circ_0002019	hsa-miR-1257
hsa_circ_0002019	hsa-miR-1280
hsa_circ_0002019	hsa-miR-1287
hsa_circ_0002019	hsa-miR-136
hsa_circ_0002019	hsa-miR-583
hsa_circ_0002019	hsa-miR-589
hsa_circ_0002019	hsa-miR-604
hsa_circ_0002019	hsa-miR-605
hsa_circ_0002019	hsa-miR-647
hsa_circ_0007613	hsa-miR-1182
hsa_circ_0007613	hsa-miR-1184
hsa_circ_0007613	hsa-miR-1205
hsa_circ_0007613	hsa-miR-127-5p
hsa_circ_0007613	hsa-miR-346
hsa_circ_0007613	hsa-miR-490-5p
hsa_circ_0007613	hsa-miR-516a-5p
hsa_circ_0007613	hsa-miR-549
hsa_circ_0007613	hsa-miR-566
hsa_circ_0007613	hsa-miR-602
hsa_circ_0007613	hsa-miR-623
hsa_circ_0031027	hsa-miR-1182
hsa_circ_0031027	hsa-miR-1248
hsa_circ_0031027	hsa-miR-1250
hsa_circ_0031027	hsa-miR-186
hsa_circ_0031027	hsa-miR-194
hsa_circ_0031027	hsa-miR-338-3p
hsa_circ_0031027	hsa-miR-375
hsa_circ_0031027	hsa-miR-543
hsa_circ_0031027	hsa-miR-558
hsa_circ_0031027	hsa-miR-566
hsa_circ_0031027	hsa-miR-577
hsa_circ_0031027	hsa-miR-587
hsa_circ_0031027	hsa-miR-619
hsa_circ_0031027	hsa-miR-629
hsa_circ_0031027	hsa-miR-634
hsa_circ_0031027	hsa-miR-636
hsa_circ_0031027	hsa-miR-640
hsa_circ_0031027	hsa-miR-646
hsa_circ_0031027	hsa-miR-766
hsa_circ_0007380	hsa-miR-1227
hsa_circ_0007380	hsa-miR-1322
hsa_circ_0007380	hsa-miR-450b-3p
hsa_circ_0007380	hsa-miR-769-3p
hsa_circ_0007380	hsa-miR-513a-3p
hsa_circ_0007380	hsa-miR-526b
hsa_circ_0007380	hsa-miR-599
hsa_circ_0007380	hsa-miR-595
hsa_circ_0007380	hsa-miR-638
hsa_circ_0007380	hsa-miR-644
hsa_circ_0001866	hsa-miR-1178
hsa_circ_0001866	hsa-miR-1200
hsa_circ_0001866	hsa-miR-1287
hsa_circ_0001866	hsa-miR-1290
hsa_circ_0001866	hsa-miR-1299
hsa_circ_0001866	hsa-miR-31
hsa_circ_0001866	hsa-miR-330-3p
hsa_circ_0001866	hsa-miR-331-3p
hsa_circ_0001866	hsa-miR-361-3p
hsa_circ_0001866	hsa-miR-382
hsa_circ_0001866	hsa-miR-421
hsa_circ_0001866	hsa-miR-510
hsa_circ_0001866	hsa-miR-512-5p
hsa_circ_0001866	hsa-miR-516b
hsa_circ_0001866	hsa-miR-543
hsa_circ_0001866	hsa-miR-558
hsa_circ_0001866	hsa-miR-581
hsa_circ_0001866	hsa-miR-587
hsa_circ_0001866	hsa-miR-639
hsa_circ_0001866	hsa-miR-659
hsa_circ_0004370	hsa-miR-1184
hsa_circ_0004370	hsa-miR-1200
hsa_circ_0004370	hsa-miR-1228
hsa_circ_0004370	hsa-miR-1236
hsa_circ_0004370	hsa-miR-1281
hsa_circ_0004370	hsa-miR-1286
hsa_circ_0004370	hsa-miR-1294
hsa_circ_0004370	hsa-miR-1304
hsa_circ_0004370	hsa-miR-139-3p
hsa_circ_0004370	hsa-miR-361-3p
hsa_circ_0004370	hsa-miR-572
hsa_circ_0004370	hsa-miR-604
hsa_circ_0004370	hsa-miR-621
hsa_circ_0004370	hsa-miR-639
hsa_circ_0004370	hsa-miR-647
hsa_circ_0004370	hsa-miR-648
hsa_circ_0004370	hsa-miR-665
hsa_circ_0004370	hsa-miR-941
hsa_circ_0004370	hsa-miR-942
hsa_circ_0008615	hsa-miR-1203
hsa_circ_0008615	hsa-miR-1206
hsa_circ_0008615	hsa-miR-1234
hsa_circ_0008615	hsa-miR-1299
hsa_circ_0008615	hsa-miR-140-3p
hsa_circ_0008615	hsa-miR-198
hsa_circ_0008615	hsa-miR-223
hsa_circ_0008615	hsa-miR-615-5p
hsa_circ_0008615	hsa-miR-665
hsa_circ_0008615	hsa-miR-766
hsa_circ_0005051	hsa-miR-136
hsa_circ_0005051	hsa-miR-330-3p
hsa_circ_0005051	hsa-miR-578
hsa_circ_0005051	hsa-miR-586
hsa_circ_0005051	hsa-miR-605
hsa_circ_0005051	hsa-miR-607
hsa_circ_0005051	hsa-miR-622
hsa_circ_0005051	hsa-miR-651
hsa_circ_0005051	hsa-miR-887
hsa_circ_0004228	hsa-miR-1231
hsa_circ_0004228	hsa-miR-127-5p
hsa_circ_0004228	hsa-miR-1324
hsa_circ_0004228	hsa-miR-370
hsa_circ_0004228	hsa-miR-548b-3p
hsa_circ_0004228	hsa-miR-579
hsa_circ_0004228	hsa-miR-623
hsa_circ_0004228	hsa-miR-654-3p
hsa_circ_0004228	hsa-miR-7
hsa_circ_0004228	hsa-miR-887
hsa_circ_0008768	hsa-miR-1206
hsa_circ_0008768	hsa-miR-1286
hsa_circ_0008768	hsa-miR-1288
hsa_circ_0008768	hsa-miR-203
hsa_circ_0008768	hsa-miR-217
hsa_circ_0008768	hsa-miR-223
hsa_circ_0008768	hsa-miR-324-5p
hsa_circ_0008768	hsa-miR-330-3p
hsa_circ_0008768	hsa-miR-361-3p
hsa_circ_0008768	hsa-miR-432
hsa_circ_0008768	hsa-miR-488
hsa_circ_0008768	hsa-miR-507
hsa_circ_0008768	hsa-miR-557
hsa_circ_0008768	hsa-miR-515-5p
hsa_circ_0008768	hsa-miR-543
hsa_circ_0008768	hsa-miR-566
hsa_circ_0008768	hsa-miR-586
hsa_circ_0008768	hsa-miR-598
hsa_circ_0008768	hsa-miR-616
hsa_circ_0008768	hsa-miR-629
hsa_circ_0008768	hsa-miR-639
hsa_circ_0008768	hsa-miR-646
hsa_circ_0008768	hsa-miR-657
hsa_circ_0008768	hsa-miR-661
hsa_circ_0008768	hsa-miR-766
hsa_circ_0008768	hsa-miR-942
hsa_circ_0055521	hsa-miR-1197
hsa_circ_0055521	hsa-miR-1264
hsa_circ_0055521	hsa-miR-1303
hsa_circ_0055521	hsa-miR-1825
hsa_circ_0055521	hsa-miR-526b
hsa_circ_0055521	hsa-miR-567
hsa_circ_0055521	hsa-miR-576-3p
hsa_circ_0055521	hsa-miR-578
hsa_circ_0055521	hsa-miR-582-3p
hsa_circ_0055521	hsa-miR-671-5p
hsa_circ_0055521	hsa-miR-885-3p
hsa_circ_0055521	hsa-miR-890
hsa_circ_0007404	hsa-miR-1182
hsa_circ_0007404	hsa-miR-186
hsa_circ_0007404	hsa-miR-338-3p
hsa_circ_0007404	hsa-miR-375
hsa_circ_0007404	hsa-miR-543
hsa_circ_0007404	hsa-miR-577
hsa_circ_0007404	hsa-miR-587
hsa_circ_0007404	hsa-miR-646
hsa_circ_0007404	hsa-miR-766
hsa_circ_0005217	hsa-miR-1184
hsa_circ_0005217	hsa-miR-1204
hsa_circ_0005217	hsa-miR-1234
hsa_circ_0005217	hsa-miR-1263
hsa_circ_0005217	hsa-miR-1287
hsa_circ_0005217	hsa-miR-1288
hsa_circ_0005217	hsa-miR-182
hsa_circ_0005217	hsa-miR-338-3p
hsa_circ_0005217	hsa-miR-502-5p
hsa_circ_0005217	hsa-miR-548c-3p
hsa_circ_0005217	hsa-miR-574-5p
hsa_circ_0005217	hsa-miR-595
hsa_circ_0005217	hsa-miR-648
hsa_circ_0005217	hsa-miR-660
hsa_circ_0005217	hsa-miR-663b
hsa_circ_0005217	hsa-miR-766
hsa_circ_0005217	hsa-miR-767-3p
hsa_circ_0003192	hsa-miR-1197
hsa_circ_0003192	hsa-miR-1206
hsa_circ_0003192	hsa-miR-1238
hsa_circ_0003192	hsa-miR-1246
hsa_circ_0003192	hsa-miR-1248
hsa_circ_0003192	hsa-miR-1281
hsa_circ_0003192	hsa-miR-1287
hsa_circ_0003192	hsa-miR-1289
hsa_circ_0003192	hsa-miR-1298
hsa_circ_0003192	hsa-miR-1299
hsa_circ_0003192	hsa-miR-1825
hsa_circ_0003192	hsa-miR-217
hsa_circ_0003192	hsa-miR-326
hsa_circ_0003192	hsa-miR-330-5p
hsa_circ_0003192	hsa-miR-337-3p
hsa_circ_0003192	hsa-miR-421
hsa_circ_0003192	hsa-miR-488
hsa_circ_0003192	hsa-miR-508-3p
hsa_circ_0003192	hsa-miR-513a-5p
hsa_circ_0003192	hsa-miR-515-5p
hsa_circ_0003192	hsa-miR-543
hsa_circ_0003192	hsa-miR-548p
hsa_circ_0003192	hsa-miR-584
hsa_circ_0003192	hsa-miR-587
hsa_circ_0003192	hsa-miR-589
hsa_circ_0003192	hsa-miR-598
hsa_circ_0003192	hsa-miR-607
hsa_circ_0003192	hsa-miR-616
hsa_circ_0003192	hsa-miR-626
hsa_circ_0003192	hsa-miR-649
hsa_circ_0003192	hsa-miR-653
hsa_circ_0003192	hsa-miR-661
hsa_circ_0003192	hsa-miR-891a
hsa_circ_0013048	hsa-miR-1272
hsa_circ_0013048	hsa-miR-1281
hsa_circ_0013048	hsa-miR-136
hsa_circ_0013048	hsa-miR-140-3p
hsa_circ_0013048	hsa-miR-203
hsa_circ_0013048	hsa-miR-433
hsa_circ_0013048	hsa-miR-513a-5p
hsa_circ_0013048	hsa-miR-515-5p
hsa_circ_0013048	hsa-miR-622
hsa_circ_0013048	hsa-miR-630
hsa_circ_0013048	hsa-miR-640

## Sheet: figure 1C
Figure 1C Venna diagram
	Figure 1C
	The list of Venna
No.	10 genes in the intersection	186 in GSF83521	141 in GSE7809
1	hsa-miR-140-3p	hsa-miR-1208	hsa-miR-4474-5p
2	hsa-miR-375	hsa-miR-1243	hsa-miR-4774-5p
3	hsa-miR-1205	hsa-miR-1246	hsa-miR-3074-3p
4	hsa-miR-421	hsa-miR-1248	hsa-miR-3607-5p
5	hsa-miR-621	hsa-miR-1286	hsa-miR-34c-3p
6	hsa-miR-648	hsa-miR-1288	hsa-miR-5008-5p
7	hsa-miR-1197	hsa-miR-1290	hsa-miR-499a-3p
8	hsa-miR-567	hsa-miR-1305	hsa-miR-4776-5p
9	hsa-miR-1263	hsa-miR-149	hsa-miR-5000-3p
10	hsa-miR-1289	hsa-miR-548g	hsa-miR-5579-3p
11		hsa-miR-578	hsa-miR-5692c
12		hsa-miR-583	hsa-miR-5692b
13		hsa-miR-658	hsa-miR-4418
14		hsa-miR-890	hsa-miR-4714-3p
15		hsa-miR-1184	hsa-miR-548au-3p
16		hsa-miR-1204	hsa-miR-3132
17		hsa-miR-1231	hsa-miR-4715-5p
18		hsa-miR-1261	hsa-miR-4699-5p
19		hsa-miR-136	hsa-miR-4691-5p
20		hsa-miR-326	hsa-miR-342-3p
21		hsa-miR-330-5p	hsa-miR-4801
22		hsa-miR-346	hsa-miR-214-5p
23		hsa-miR-383	hsa-miR-93-3p
24		hsa-miR-432	hsa-miR-548v
25		hsa-miR-513a-5p	hsa-miR-3140-3p
26		hsa-miR-516b	hsa-miR-323b-3p
27		hsa-miR-545	hsa-miR-222-5p
28		hsa-miR-587	hsa-miR-148b-5p
29		hsa-miR-1270	hsa-miR-494-3p
30		hsa-miR-620	hsa-miR-5003-5p
31		hsa-miR-630	hsa-miR-3664-3p
32		hsa-miR-651	hsa-miR-3663-3p
33		hsa-miR-660	ebv-miR-BART22
34		hsa-miR-885-5p	hsa-miR-187-5p
35		hsa-miR-889	hsa-miR-3671
36		hsa-miR-935	hsa-miR-4517
37		hsa-miR-1203	kshv-miR-K12-3-3p
38		hsa-miR-1264	hsa-miR-875-3p
39		hsa-miR-198	hsa-miRPlus-A1087
40		hsa-miR-370	hsa-miR-411-5p
41		hsa-miR-619	hsa-miR-1266-5p
42		hsa-miR-659	hsa-miR-98-3p
43		hsa-miR-877	hsa-miR-3154
44		hsa-miR-942	hsa-miR-3168
45		hsa-miR-1238	hsa-miR-4520-3p
46		hsa-miR-1253	hsa-miR-379-5p
47		hsa-miR-1272	hsa-miR-33a-3p
48		hsa-miR-1322	hsa-miR-4652-5p
49		hsa-miR-182	hsa-miR-3192-5p
50		hsa-miR-197	hsa-miR-539-3p
51		hsa-miR-486-3p	hsa-miR-1271-5p
52		hsa-miR-615-3p	ebv-miR-BART17-5p
53		hsa-miR-665	hsa-miR-323b-5p
54		hsa-miR-766	hsa-miR-4509
55		hsa-miR-1234	hsa-miR-196b-3p
56		hsa-miR-1276	hsa-miR-4659b-5p
57		hsa-miR-147b	hsa-miR-99a-3p
58		hsa-miR-210	hsa-miR-4776-3p
59		hsa-miR-339-3p	hsa-miR-95-3p
60		hsa-miR-523	hsa-miR-378i
61		hsa-miR-589	hsa-miR-455-3p
62		hsa-miR-604	hsa-miR-20a-3p
63		hsa-miR-653	hsa-miR-377-3p
64		hsa-miR-933	hsa-miR-4711-5p
65		hsa-miR-1206	hsa-miR-410-5p
66		hsa-miR-203	hsa-miR-301a-3p
67		hsa-miR-217	hsa-miR-302d-5p
68		hsa-miR-223	hsa-miR-4779
69		hsa-miR-324-5p	hsa-miR-4293
70		hsa-miR-330-3p	hsa-miR-4321
71		hsa-miR-361-3p	hsa-miR-4291
72		hsa-miR-488	hsa-miR-214-3p
73		hsa-miR-507	hsa-miR-4457
74		hsa-miR-557	hsa-miR-101-5p
75		hsa-miR-515-5p	hsa-miR-199b-3p
76		hsa-miR-566	hsa-miR-199a-3p
77		hsa-miR-586	hsa-miR-3129-5p
78		hsa-miR-598	hsa-miR-4522
79		hsa-miR-616	hsa-miR-329-3p
80		hsa-miR-646	hsa-miR-181c-5p
81		hsa-miR-657	hsa-miR-9-5p
82		hsa-miR-1299	hsa-miR-335-5p
83		hsa-miR-335	hsa-let-7i-3p
84		hsa-miR-338-3p	hsa-miR-628-5p
85		hsa-miR-450b-3p	hsa-miR-199a-5p
86		hsa-miR-769-3p	hsa-miR-215-5p
87		hsa-miR-503	hsa-miR-4317
88		hsa-miR-644	hsa-miR-152-3p
89		hsa-miR-663b	hsa-miR-525-5p
90		hsa-miR-940	hsa-miR-5702
91		hsa-miR-1236	hsa-miR-4757-3p
92		hsa-miR-1277	hsa-miR-10a-5p
93		hsa-miR-1287	hsa-miR-5707
94		hsa-miR-1304	hsa-miR-188-3p
95		hsa-miR-184	hsa-miR-3919
96		hsa-miR-224	hsa-miR-5186
97		hsa-miR-492	hsa-miR-34b-5p
98		hsa-miR-548l	hsa-miR-412-3p
99		hsa-miR-548m	hsa-miR-517-5p
100		hsa-miR-561	hsa-miR-4438
101		hsa-miR-577	hsa-miR-4804-5p
102		hsa-miR-579	hsa-miR-100-5p
103		hsa-miR-580	hsa-miR-199b-5p
104		hsa-miR-607	hsa-miR-497-5p
105		hsa-miR-626	hsa-miR-15a-5p
106		hsa-miR-636	hsa-miR-218-5p
107		hsa-miR-638	hsa-miR-4762-3p
108		hsa-miR-640	hsa-miR-20a-5p
109		hsa-miR-654-3p	hsa-miR-570-3p
110		hsa-miR-668	hsa-miR-195-5p
111		hsa-miR-874	hsa-miR-4423-3p
112		hsa-miR-382	hsa-miR-202-3p
113		hsa-miR-409-3p	hsa-miR-4668-3p
114		hsa-miR-431	hsa-miR-3973
115		hsa-miR-520g	hsa-miR-4717-3p
116		hsa-miR-520h	hsa-miR-4751
117		hsa-miR-548k	hsa-miR-548aq-5p
118		hsa-miR-548p	hsa-miR-1245b-5p
119		hsa-miR-558	hsa-miR-454-3p
120		hsa-miR-593	ebv-miR-BART3-3p
121		hsa-miR-618	hsa-miR-889-3p
122		hsa-miR-635	hsa-miR-3691-3p
123		hsa-miR-155	hsa-miR-3139
124		hsa-miR-576-5p	hsa-miR-4797-3p
125		hsa-miR-1827	hsa-miR-190a-5p
126		hsa-miR-885-3p	hsa-miR-23c
127		hsa-miR-1224-3p	hsa-miR-133a-5p
128		hsa-miR-1257	hsa-miR-223-5p
129		hsa-miR-1280	hsa-miR-374a-3p
130		hsa-miR-605	hsa-miR-3658
131		hsa-miR-647	hsa-miR-4770
132		hsa-miR-1182	hsa-miR-135b-5p
133		hsa-miR-127-5p	hsa-miR-32-5p
134		hsa-miR-490-5p	hsa-miR-1297
135		hsa-miR-516a-5p	hsa-miR-28-5p
136		hsa-miR-549	hsa-miR-196b-5p
137		hsa-miR-602	hsa-miR-374a-5p
138		hsa-miR-623	hsa-miR-19a-5p
139		hsa-miR-1250	hsa-miR-145-3p
140		hsa-miR-186	hsa-miR-122-5p
141		hsa-miR-194	hsa-miR-200c-3p
142		hsa-miR-543
143		hsa-miR-629
144		hsa-miR-634
145		hsa-miR-1227
146		hsa-miR-513a-3p
147		hsa-miR-526b
148		hsa-miR-599
149		hsa-miR-595
150		hsa-miR-1178
151		hsa-miR-1200
152		hsa-miR-31
153		hsa-miR-331-3p
154		hsa-miR-510
155		hsa-miR-512-5p
156		hsa-miR-581
157		hsa-miR-639
158		hsa-miR-1228
159		hsa-miR-1281
160		hsa-miR-1294
161		hsa-miR-139-3p
162		hsa-miR-572
163		hsa-miR-941
164		hsa-miR-615-5p
165		hsa-miR-622
166		hsa-miR-887
167		hsa-miR-1324
168		hsa-miR-548b-3p
169		hsa-miR-7
170		hsa-miR-661
171		hsa-miR-1303
172		hsa-miR-1825
173		hsa-miR-576-3p
174		hsa-miR-582-3p
175		hsa-miR-671-5p
176		hsa-miR-502-5p
177		hsa-miR-548c-3p
178		hsa-miR-574-5p
179		hsa-miR-767-3p
180		hsa-miR-1298
181		hsa-miR-337-3p
182		hsa-miR-508-3p
183		hsa-miR-584
184		hsa-miR-649
185		hsa-miR-891a
186		hsa-miR-433

## Sheet: figure 1D
Figure 1D The miR-375 expression in human GC and adjacent normal gastric mucosa tissues (from the miRNA expression microarray GSE78091).
	Figure 1D
miR-375 expression	GC			Normal
	GSM2066577	GSM2066578	GSM2066579	GSM2066580	GSM2066581	GSM2066582	P
	2.23616	0.866279	3.95597	5.8	12.706	8.85934	0.036

## Sheet: figure2
Figure 2 Screening and identification of SGC-7901 cancer stem cells.
Figure 2A
qRT-PCR	GES	SGC 7901	AGS	amplification curve		melting curve
circ0051246	28.585	28.2067	28.4087
circ0051246	28.5472	28.2102	28.1619
circ0051246	28.3759	28.0674	28.4039
GAPDH	23.8598	25.4726	24.0845
GAPDH	24.0168	25.3962	24.1885
GAPDH	24.0134	25.3162	24.0782
2^(-ΔΔCt)	0.944549	3.31189	1.18735
	0.969608	3.30399	1.40895
	1.09189	3.64767	1.19137
P		3.82454e-05	0.0390701
Figure 2B
qRT-PCR	SGC 7901	SGC 7901 CSC	amplification curve		melting curve
circ0051246	28.3979	28.1236
circ0051246	28.5511	28.2319
circ0051246	28.4837	28.1787
GAPDH	25.8216	25.6908
GAPDH	25.8937	25.6592
GAPDH	25.9193	25.922
2^(-ΔΔCt)	1.05676	1.17537
	0.950308	1.0904
	0.995773	1.1313
P		0.0289792

## Sheet: figure3
Figure 3 Circ_0051246 promoted the proliferation and self-renewal in SGC-7901 cancer stem cells.
Figure 3A
qRT-PCR	Control	si-NC	sh-circ 0051246#1	sh-circ 0051246#2	sh-circ 0051246#3	amplification curve		melting curve
circ0051246	23.1446	23.1896	23.7063	23.7881	23.931
circ0051246	23.0161	23.0908	23.4078	23.5145	24.1319
circ0051246	23.2555	22.9203	23.5011	23.6422	24.126
GAPDH	23.462	23.3754	23.3545	23.2948	23.2935
GAPDH	23.4775	23.4023	23.4092	23.2891	23.3018
GAPDH	23.4973	23.3558	23.3536	23.297	23.282
2^(-ΔΔCt)	0.99594	0.900039	0.626717	0.560709	0.50741
	1.08872	0.963784	0.770796	0.677823	0.441436
	0.922257	1.08472	0.722534	0.620368	0.443252
P		0.997	0.006	0.001	0
Figure 3A
qRT-PCR	Control	cir-NC	circ 0051246	amplification curve		melting curve
circ0051246	23.421	23.3948	22.6701
circ0051246	23.1431	23.1138	22.5636
circ0051246	23.2532	23.2517	22.3828
GAPDH	23.1594	23.2304	23.2396
GAPDH	23.288	23.2663	23.2537
GAPDH	23.2109	23.2194	23.4488
2^(-ΔΔCt)	0.902144	0.931066	1.6211
	1.09378	1.1313	1.74532
	1.01343	1.02815	1.97835
P		0.966	0.01
Figure 3B					Figure 3B				Figure 3B
CCK8	sh-NC	sh-circ 0051246	blank control		sphere formation	sh-NC	sh-circ 0051246		colony formation assay	sh-NC	sh-circ 0051246
1	0.9586	0.619	0.0574		1	56	40		1	114	61
2	0.8321	0.6738	0.0521		2	64	34		2	98	70
3	1.0028	0.6322	0.055		3	58	41		3	119	59
4	0.8281	0.766	0.0552		P		0.003		P		0.003
5	0.9754	0.6372	0.063
P		0.001
Figure 3C					Figure 3C				Figure 3C
CCK8	cir-NC	circ 0051246	blank control		sphere formation	cir-NC	circ 0051246		colony formation assay	cir-NC	circ 0051246
1	0.9372	1.3079	0.0428		1	61	86		1	119	175
2	1.0593	1.0186	0.0427		2	57	99		2	130	154
3	0.935	1.1824	0.051		3	68	107		3	108	187
4	0.9688	1.0784	0.0512		P		0.007		P		0.01
5	1.0684	1.226	0.0468
P		0.022
Figure 3F
EdU	sh-NC	sh-circ 0051246
EdU-positive cell number	124	51
	112	49
	129	59
Total cell number	259	241
	249	249
	246	252
Positive cell rate (%)	47.8764	21.1618
	44.9799	19.6787
	52.439	23.4127
P		0
Figure 3E
EdU	cir-NC	circ 0051246
EdU-positive cell number	86	151
	103	143
	114	132
Total cell number	216	251
	247	218
	251	237
Positive cell rate (%)	39.8148	60.1594
	41.7004	65.5963
	45.4183	55.6962
P		0.005
